# Supplementary material
Source: PubMed Central journal article supplement (PMC4725274)
Supplement: AEM.02839-15_zam999116898so1.pdf [file AEM.02839-15_zam999116898so1.pdf]

## **SUPPLEMENTAL FIGURE LEGENDS**

Figure S1. Comparison of the level of STEC O157 carriage among individual steers. STEC O157 CFU per RAJ swab during all four 56-day trials were converted to single  $\log_{10}$  AUC values for each steer. Bars represent least squares mean  $\log_{10}$  AUC and error bars indicate SEM.

Figure S2. Comparison of clinical and bovine STEC O157 strain colonization of experimental steers in the four seasonal trials. In each trial, steers were challenged with equal numbers of four different STEC O157 genotypes, including two clinical strains (C1 and C2, clinical genotypes) and two bovine strains (B1 and B2, bovine-biased genotypes).  $\log_{10}$  CFU of clinical and bovine strains recovered from RAJ swab samples on each sampling day for each of the four trials [HS (high dose, summer), HW (high dose, winter), LS (low dose, summer) and LW (low dose, winter)].

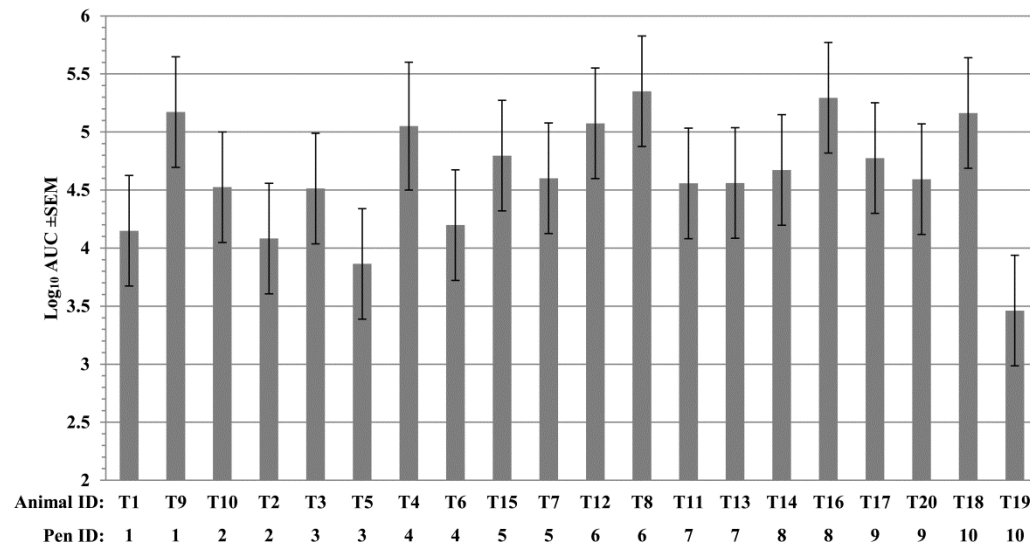

Figure S1. Comparison of the level of STEC O157 carriage among individual steers. STEC O157 CFU per RAJ swab during all four 56-day trials were converted to single log<sub>10</sub> AUC values for each steer. Bars represent least squares mean Log<sub>10</sub> AUC and error bars indicate SEM.

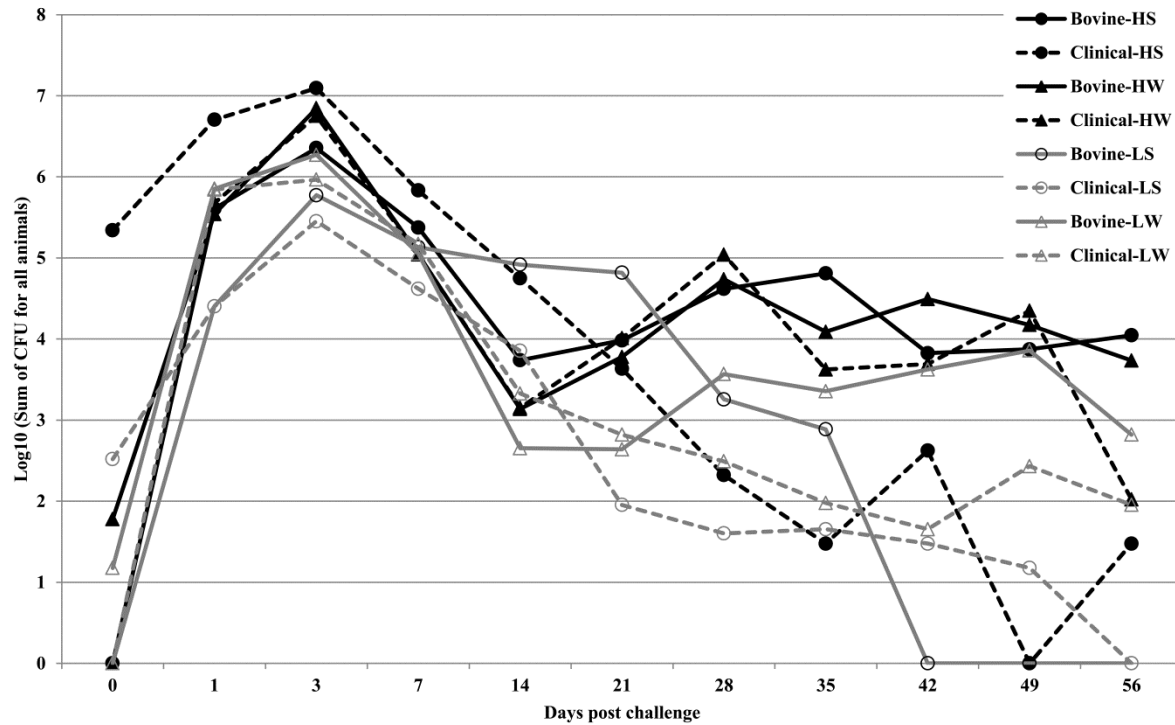

Figure S2. Comparison of clinical and bovine STEC O157 strain colonization of experimental steers in the four seasonal trials. In each trial, steers were challenged with equal numbers of four different STEC O157 genotypes, including two clinical strains (C1 and C2, clinical genotypes) and two bovine strains (B1 and B2, bovine-biased genotypes). Log<sub>10</sub> CFU of clinical and bovine strains recovered from RAJ swab samples on each sampling day for each of the four trials [HS (high dose, summer), HW (high dose, winter), LS (low dose, summer) and LW (low dose, winter)].

Table S1- RAJ swab CFU and colony genotypes

| Animal ID | Pen ID | Dose | Season | Route | Day | STEC O157 CFU counts | Strain C1 | Strain C2 | Strain B1 | Strain B2 |
|-----------|--------|------|--------|-------|-----|----------------------|-----------|-----------|-----------|-----------|
| T1        | 1      | High | Summer | Oral  | 0   | 0                    | 0         | 0         | 0         | 0         |
| T1        | 1      | High | Summer | Oral  | 1   | 87000                | 5         | 1         | 5         | 1         |
| T1        | 1      | High | Summer | Oral  | 3   | 291000               | 4         | 0         | 2         | 6         |
| T1        | 1      | High | Summer | Oral  | 7   | 60                   | 2         | 0         | 0         | 0         |
| T1        | 1      | High | Summer | Oral  | 14  | 0                    | 0         | 0         | 0         | 0         |
| T1        | 1      | High | Summer | Oral  | 21  | 0                    | 0         | 0         | 0         | 0         |
| T1        | 1      | High | Summer | Oral  | 28  | 0                    | 0         | 3         | 0         | 0         |
| T1        | 1      | High | Summer | Oral  | 35  | 0                    | 0         | 0         | 0         | 0         |
| T1        | 1      | High | Summer | Oral  | 42  | 0                    | 0         | 0         | 0         | 0         |
| T1        | 1      | High | Summer | Oral  | 49  | 0                    | 0         | 0         | 0         | 0         |
| T1        | 1      | High | Summer | Oral  | 56  | 0                    | 0         | 0         | 0         | 0         |
| T10       | 2      | High | Summer | Oral  | 0   | 0                    | 0         | 0         | 0         | 0         |
| T10       | 2      | High | Summer | Oral  | 1   | 3360                 | 3         | 1         | 7         | 1         |
| T10       | 2      | High | Summer | Oral  | 3   | 18600                | 1         | 0         | 4         | 7         |
| T10       | 2      | High | Summer | Oral  | 7   | 60                   | 0         | 0         | 1         | 1         |
| T10       | 2      | High | Summer | Oral  | 14  | 0                    | 0         | 0         | 0         | 0         |
| T10       | 2      | High | Summer | Oral  | 21  | 210                  | 0         | 0         | 0         | 9         |
| T10       | 2      | High | Summer | Oral  | 28  | 390                  | 0         | 0         | 0         | 12        |
| T10       | 2      | High | Summer | Oral  | 35  | 1200                 | 0         | 0         | 0         | 9         |
| T10       | 2      | High | Summer | Oral  | 42  | 15                   | 0         | 0         | 0         | 3         |
| T10       | 2      | High | Summer | Oral  | 49  | 0                    | 0         | 0         | 0         | 0         |
| T10       | 2      | High | Summer | Oral  | 56  | 0                    | 0         | 0         | 0         | 0         |
| T12       | 6      | High | Summer | Oral  | 0   | 15                   | 0         | 2         | 0         | 0         |
| T12       | 6      | High | Summer | Oral  | 1   | 183000               | 4         | 0         | 6         | 2         |
| T12       | 6      | High | Summer | Oral  | 3   | 534000               | 2         | 0         | 4         | 6         |
| T12       | 6      | High | Summer | Oral  | 7   | 540                  | 7         | 0         | 0         | 5         |
| T12       | 6      | High | Summer | Oral  | 14  | 0                    | 0         | 0         | 0         | 0         |
| T12       | 6      | High | Summer | Oral  | 21  | 0                    | 0         | 0         | 0         | 0         |
| T12       | 6      | High | Summer | Oral  | 28  | 0                    | 0         | 0         | 0         | 0         |
| T12       | 6      | High | Summer | Oral  | 35  | 0                    | 0         | 0         | 0         | 0         |
| T12       | 6      | High | Summer | Oral  | 42  | 0                    | 0         | 0         | 0         | 0         |
| T12       | 6      | High | Summer | Oral  | 49  | 0                    | 0         | 0         | 0         | 0         |
| T12       | 6      | High | Summer | Oral  | 56  | 0                    | 0         | 0         | 0         | 0         |
| T17       | 9      | High | Summer | Oral  | 0   | 0                    | 0         | 0         | 0         | 0         |
| T17       | 9      | High | Summer | Oral  | 1   | 4680000              | 0         | 12        | 0         | 0         |
| T17       | 9      | High | Summer | Oral  | 3   | 48000                | 3         | 3         | 2         | 4         |

| Animal ID | Pen ID | Dose | Season | Route | Day | STEC O157 CFU counts | Strain C1 | Strain C2 | Strain B1 | Strain B2 |
|-----------|--------|------|--------|-------|-----|----------------------|-----------|-----------|-----------|-----------|
| T17       | 9      | High | Summer | Oral  | 7   | 6300                 | 1         | 2         | 0         | 9         |
| T17       | 9      | High | Summer | Oral  | 14  | 180                  | 0         | 0         | 0         | 7         |
| T17       | 9      | High | Summer | Oral  | 21  | 7200                 | 0         | 0         | 0         | 12        |
| T17       | 9      | High | Summer | Oral  | 28  | 35100                | 0         | 0         | 0         | 12        |
| T17       | 9      | High | Summer | Oral  | 35  | 9000                 | 0         | 0         | 0         | 12        |
| T17       | 9      | High | Summer | Oral  | 42  | 5700                 | 0         | 0         | 0         | 12        |
| T17       | 9      | High | Summer | Oral  | 49  | 6900                 | 0         | 0         | 0         | 12        |
| T17       | 9      | High | Summer | Oral  | 56  | 4800                 | 0         | 0         | 0         | 12        |
| T2        | 2      | High | Summer | Oral  | 0   | 120                  | 0         | 5         | 0         | 0         |
| T2        | 2      | High | Summer | Oral  | 1   | 7400                 | 3         | 7         | 1         | 1         |
| T2        | 2      | High | Summer | Oral  | 3   | 10800                | 0         | 12        | 0         | 0         |
| T2        | 2      | High | Summer | Oral  | 7   | 10200                | 0         | 12        | 0         | 0         |
| T2        | 2      | High | Summer | Oral  | 14  | 90                   | 0         | 3         | 0         | 0         |
| T2        | 2      | High | Summer | Oral  | 21  | 3600                 | 0         | 12        | 0         | 0         |
| T2        | 2      | High | Summer | Oral  | 28  | 15                   | 0         | 3         | 0         | 0         |
| T2        | 2      | High | Summer | Oral  | 35  | 0                    | 0         | 0         | 0         | 0         |
| T2        | 2      | High | Summer | Oral  | 42  | 360                  | 0         | 12        | 0         | 0         |
| T2        | 2      | High | Summer | Oral  | 49  | 0                    | 0         | 0         | 0         | 0         |
| T2        | 2      | High | Summer | Oral  | 56  | 0                    | 0         | 0         | 0         | 0         |
| T20       | 9      | High | Summer | Oral  | 0   | 0                    | 0         | 0         | 0         | 0         |
| T20       | 9      | High | Summer | Oral  | 1   | 9000                 | 7         | 0         | 2         | 3         |
| T20       | 9      | High | Summer | Oral  | 3   | 25800                | 4         | 0         | 5         | 3         |
| T20       | 9      | High | Summer | Oral  | 7   | 2340                 | 6         | 0         | 2         | 4         |
| T20       | 9      | High | Summer | Oral  | 14  | 0                    | 0         | 0         | 0         | 0         |
| T20       | 9      | High | Summer | Oral  | 21  | 0                    | 0         | 0         | 0         | 0         |
| T20       | 9      | High | Summer | Oral  | 28  | 0                    | 0         | 0         | 0         | 0         |
| T20       | 9      | High | Summer | Oral  | 35  | 0                    | 0         | 0         | 0         | 3         |
| T20       | 9      | High | Summer | Oral  | 42  | 0                    | 0         | 0         | 0         | 0         |
| T20       | 9      | High | Summer | Oral  | 49  | 0                    | 0         | 0         | 0         | 0         |
| T20       | 9      | High | Summer | Oral  | 56  | 0                    | 0         | 0         | 0         | 0         |
| T4        | 4      | High | Summer | Oral  | 0   | 0                    | 0         | 0         | 0         | 0         |
| T4        | 4      | High | Summer | Oral  | 1   | 171000               | 5         | 0         | 5         | 2         |
| T4        | 4      | High | Summer | Oral  | 3   | 11400                | 2         | 1         | 8         | 1         |
| T4        | 4      | High | Summer | Oral  | 7   | 0                    | 0         | 0         | 0         | 0         |
| T4        | 4      | High | Summer | Oral  | 14  | 0                    | 0         | 0         | 0         | 0         |
| T4        | 4      | High | Summer | Oral  | 21  | 0                    | 0         | 0         | 0         | 0         |
| T4        | 4      | High | Summer | Oral  | 28  | 0                    | 0         | 0         | 0         | 0         |
| T4        | 4      | High | Summer | Oral  | 35  | 0                    | 0         | 0         | 0         | 0         |

| Animal ID | Pen ID | Dose | Season | Route  | Day | STEC O157 CFU counts | Strain C1 | Strain C2 | Strain B1 | Strain B2 |
|-----------|--------|------|--------|--------|-----|----------------------|-----------|-----------|-----------|-----------|
| T4        | 4      | High | Summer | Oral   | 42  | 0                    | 0         | 0         | 0         | 0         |
| T4        | 4      | High | Summer | Oral   | 49  | 0                    | 0         | 0         | 0         | 0         |
| T4        | 4      | High | Summer | Oral   | 56  | 0                    | 0         | 0         | 0         | 0         |
| T6        | 4      | High | Summer | Oral   | 0   | 15                   | 0         | 2         | 0         | 0         |
| T6        | 4      | High | Summer | Oral   | 1   | 3900                 | 9         | 0         | 3         | 0         |
| T6        | 4      | High | Summer | Oral   | 3   | 16200                | 11        | 0         | 1         | 0         |
| T6        | 4      | High | Summer | Oral   | 7   | 7800                 | 10        | 0         | 2         | 0         |
| T6        | 4      | High | Summer | Oral   | 14  | 90                   | 2         | 1         | 0         | 0         |
| T6        | 4      | High | Summer | Oral   | 21  | 0                    | 0         | 0         | 0         | 0         |
| T6        | 4      | High | Summer | Oral   | 28  | 0                    | 0         | 0         | 0         | 0         |
| T6        | 4      | High | Summer | Oral   | 35  | 0                    | 0         | 0         | 0         | 0         |
| T6        | 4      | High | Summer | Oral   | 42  | 0                    | 0         | 0         | 0         | 0         |
| T6        | 4      | High | Summer | Oral   | 49  | 0                    | 0         | 0         | 0         | 0         |
| T6        | 4      | High | Summer | Oral   | 56  | 0                    | 0         | 0         | 0         | 0         |
| T8        | 6      | High | Summer | Oral   | 0   | 0                    | 0         | 0         | 0         | 0         |
| T8        | 6      | High | Summer | Oral   | 1   | 2200                 | 5         | 0         | 1         | 2         |
| T8        | 6      | High | Summer | Oral   | 3   | 243000               | 4         | 0         | 4         | 4         |
| T8        | 6      | High | Summer | Oral   | 7   | 9300                 | 6         | 0         | 0         | 6         |
| T8        | 6      | High | Summer | Oral   | 14  | 660                  | 12        | 0         | 0         | 0         |
| T8        | 6      | High | Summer | Oral   | 21  | 0                    | 0         | 0         | 0         | 0         |
| T8        | 6      | High | Summer | Oral   | 28  | 0                    | 0         | 0         | 0         | 0         |
| T8        | 6      | High | Summer | Oral   | 35  | 0                    | 0         | 0         | 0         | 0         |
| T8        | 6      | High | Summer | Oral   | 42  | 0                    | 0         | 0         | 0         | 0         |
| T8        | 6      | High | Summer | Oral   | 49  | 0                    | 0         | 0         | 0         | 0         |
| T8        | 6      | High | Summer | Oral   | 56  | 0                    | 0         | 0         | 0         | 0         |
| T9        | 1      | High | Summer | Oral   | 0   | 0                    | 0         | 0         | 0         | 0         |
| T9        | 1      | High | Summer | Oral   | 1   | 132000               | 8         | 0         | 1         | 3         |
| T9        | 1      | High | Summer | Oral   | 3   | 1830000              | 6         | 1         | 1         | 4         |
| T9        | 1      | High | Summer | Oral   | 7   | 540                  | 11        | 0         | 1         | 0         |
| T9        | 1      | High | Summer | Oral   | 14  | 0                    | 0         | 0         | 0         | 0         |
| T9        | 1      | High | Summer | Oral   | 21  | 0                    | 0         | 0         | 0         | 0         |
| T9        | 1      | High | Summer | Oral   | 28  | 0                    | 0         | 0         | 0         | 0         |
| T9        | 1      | High | Summer | Oral   | 35  | 0                    | 0         | 0         | 0         | 0         |
| T9        | 1      | High | Summer | Oral   | 42  | 0                    | 0         | 0         | 0         | 0         |
| T9        | 1      | High | Summer | Oral   | 49  | 0                    | 0         | 0         | 0         | 0         |
| T9        | 1      | High | Summer | Oral   | 56  | 0                    | 0         | 0         | 0         | 0         |
| T11       | 7      | High | Summer | Rectal | 0   | 0                    | 0         | 0         | 0         | 0         |
| T11       | 7      | High | Summer | Rectal | 1   | 2910                 | 3         | 4         | 4         | 1         |

| Animal ID | Pen ID | Dose | Season | Route  | Day | STEC O157 CFU counts | Strain C1 | Strain C2 | Strain B1 | Strain B2 |
|-----------|--------|------|--------|--------|-----|----------------------|-----------|-----------|-----------|-----------|
| T11       | 7      | High | Summer | Rectal | 3   | 930000               | 4         | 3         | 0         | 5         |
| T11       | 7      | High | Summer | Rectal | 7   | 15                   | 0         | 0         | 0         | 0         |
| T11       | 7      | High | Summer | Rectal | 14  | 15                   | 3         | 0         | 0         | 0         |
| T11       | 7      | High | Summer | Rectal | 21  | 90                   | 3         | 0         | 0         | 0         |
| T11       | 7      | High | Summer | Rectal | 28  | 60                   | 1         | 0         | 0         | 0         |
| T11       | 7      | High | Summer | Rectal | 35  | 30                   | 1         | 0         | 0         | 0         |
| T11       | 7      | High | Summer | Rectal | 42  | 60                   | 1         | 0         | 0         | 0         |
| T11       | 7      | High | Summer | Rectal | 49  | 0                    | 0         | 0         | 0         | 0         |
| T11       | 7      | High | Summer | Rectal | 56  | 0                    | 0         | 0         | 0         | 0         |
| T13       | 7      | High | Summer | Rectal | 0   | 0                    | 0         | 0         | 0         | 0         |
| T13       | 7      | High | Summer | Rectal | 1   | 3300                 | 1         | 2         | 1         | 7         |
| T13       | 7      | High | Summer | Rectal | 3   | 7200                 | 6         | 0         | 4         | 2         |
| T13       | 7      | High | Summer | Rectal | 7   | 300                  | 5         | 0         | 3         | 2         |
| T13       | 7      | High | Summer | Rectal | 14  | 15                   | 5         | 0         | 0         | 1         |
| T13       | 7      | High | Summer | Rectal | 21  | 60                   | 1         | 0         | 0         | 1         |
| T13       | 7      | High | Summer | Rectal | 28  | 15                   | 0         | 0         | 0         | 0         |
| T13       | 7      | High | Summer | Rectal | 35  | 0                    | 0         | 0         | 0         | 0         |
| T13       | 7      | High | Summer | Rectal | 42  | 0                    | 0         | 0         | 0         | 0         |
| T13       | 7      | High | Summer | Rectal | 49  | 0                    | 0         | 0         | 0         | 0         |
| T13       | 7      | High | Summer | Rectal | 56  | 0                    | 0         | 0         | 0         | 0         |
| T14       | 8      | High | Summer | Rectal | 0   | 0                    | 0         | 0         | 0         | 0         |
| T14       | 8      | High | Summer | Rectal | 1   | 1200                 | 1         | 4         | 2         | 5         |
| T14       | 8      | High | Summer | Rectal | 3   | 14400                | 5         | 1         | 6         | 0         |
| T14       | 8      | High | Summer | Rectal | 7   | 270                  | 3         | 2         | 2         | 2         |
| T14       | 8      | High | Summer | Rectal | 14  | 0                    | 0         | 0         | 0         | 0         |
| T14       | 8      | High | Summer | Rectal | 21  | 0                    | 0         | 0         | 0         | 0         |
| T14       | 8      | High | Summer | Rectal | 28  | 0                    | 0         | 0         | 0         | 0         |
| T14       | 8      | High | Summer | Rectal | 35  | 0                    | 0         | 0         | 0         | 0         |
| T14       | 8      | High | Summer | Rectal | 42  | 0                    | 0         | 0         | 0         | 0         |
| T14       | 8      | High | Summer | Rectal | 49  | 0                    | 0         | 0         | 0         | 0         |
| T14       | 8      | High | Summer | Rectal | 56  | 0                    | 0         | 0         | 0         | 0         |
| T15       | 5      | High | Summer | Rectal | 0   | 0                    | 0         | 0         | 0         | 0         |
| T15       | 5      | High | Summer | Rectal | 1   | 31500                | 0         | 1         | 3         | 8         |
| T15       | 5      | High | Summer | Rectal | 3   | 129000               | 1         | 2         | 0         | 9         |
| T15       | 5      | High | Summer | Rectal | 7   | 180                  | 0         | 1         | 0         | 5         |
| T15       | 5      | High | Summer | Rectal | 14  | 0                    | 0         | 0         | 0         | 0         |
| T15       | 5      | High | Summer | Rectal | 21  | 0                    | 0         | 0         | 0         | 0         |
| T15       | 5      | High | Summer | Rectal | 28  | 0                    | 0         | 0         | 0         | 0         |

| Animal ID | Pen ID | Dose | Season | Route  | Day | STEC O157 CFU counts | Strain C1 | Strain C2 | Strain B1 | Strain B2 |
|-----------|--------|------|--------|--------|-----|----------------------|-----------|-----------|-----------|-----------|
| T15       | 5      | High | Summer | Rectal | 35  | 0                    | 0         | 0         | 0         | 0         |
| T15       | 5      | High | Summer | Rectal | 42  | 0                    | 0         | 0         | 0         | 0         |
| T15       | 5      | High | Summer | Rectal | 49  | 0                    | 0         | 0         | 0         | 0         |
| T15       | 5      | High | Summer | Rectal | 56  | 0                    | 0         | 0         | 0         | 0         |
| T16       | 8      | High | Summer | Rectal | 0   | 15                   | 0         | 2         | 0         | 0         |
| T16       | 8      | High | Summer | Rectal | 1   | 19200                | 10        | 1         | 0         | 1         |
| T16       | 8      | High | Summer | Rectal | 3   | 2610                 | 12        | 0         | 0         | 0         |
| T16       | 8      | High | Summer | Rectal | 7   | 720000               | 10        | 0         | 0         | 2         |
| T16       | 8      | High | Summer | Rectal | 14  | 60000                | 11        | 0         | 0         | 1         |
| T16       | 8      | High | Summer | Rectal | 21  | 120                  | 0         | 0         | 0         | 4         |
| T16       | 8      | High | Summer | Rectal | 28  | 4800                 | 0         | 0         | 0         | 12        |
| T16       | 8      | High | Summer | Rectal | 35  | 240                  | 0         | 0         | 0         | 9         |
| T16       | 8      | High | Summer | Rectal | 42  | 90                   | 0         | 0         | 0         | 3         |
| T16       | 8      | High | Summer | Rectal | 49  | 0                    | 0         | 0         | 0         | 0         |
| T16       | 8      | High | Summer | Rectal | 56  | 0                    | 0         | 0         | 0         | 0         |
| T18       | 10     | High | Summer | Rectal | 0   | 0                    | 0         | 0         | 0         | 0         |
| T18       | 10     | High | Summer | Rectal | 1   | 96000                | 7         | 0         | 4         | 1         |
| T18       | 10     | High | Summer | Rectal | 3   | 10300000             | 0         | 12        | 0         | 0         |
| T18       | 10     | High | Summer | Rectal | 7   | 332                  | 4         | 0         | 7         | 0         |
| T18       | 10     | High | Summer | Rectal | 14  | 0                    | 0         | 0         | 0         | 0         |
| T18       | 10     | High | Summer | Rectal | 21  | 0                    | 0         | 0         | 0         | 0         |
| T18       | 10     | High | Summer | Rectal | 28  | 0                    | 0         | 0         | 0         | 0         |
| T18       | 10     | High | Summer | Rectal | 35  | 0                    | 0         | 0         | 0         | 0         |
| T18       | 10     | High | Summer | Rectal | 42  | 0                    | 0         | 0         | 0         | 0         |
| T18       | 10     | High | Summer | Rectal | 49  | 0                    | 0         | 0         | 0         | 0         |
| T18       | 10     | High | Summer | Rectal | 56  | 0                    | 0         | 0         | 0         | 0         |
| T19       | 10     | High | Summer | Rectal | 0   | 220000               | 0         | 12        | 0         | 0         |
| T19       | 10     | High | Summer | Rectal | 1   | 1320                 | 2         | 7         | 2         | 1         |
| T19       | 10     | High | Summer | Rectal | 3   | 210                  | 2         | 4         | 0         | 1         |
| T19       | 10     | High | Summer | Rectal | 7   | 540                  | 0         | 0         | 1         | 11        |
| T19       | 10     | High | Summer | Rectal | 14  | 150                  | 3         | 0         | 1         | 1         |
| T19       | 10     | High | Summer | Rectal | 21  | 300                  | 1         | 0         | 0         | 0         |
| T19       | 10     | High | Summer | Rectal | 28  | 120                  | 0         | 4         | 0         | 0         |
| T19       | 10     | High | Summer | Rectal | 35  | 0                    | 0         | 0         | 0         | 0         |
| T19       | 10     | High | Summer | Rectal | 42  | 0                    | 0         | 0         | 0         | 0         |
| T19       | 10     | High | Summer | Rectal | 49  | 0                    | 0         | 0         | 0         | 0         |
| T19       | 10     | High | Summer | Rectal | 56  | 0                    | 0         | 0         | 0         | 0         |
| T3        | 3      | High | Summer | Rectal | 0   | 0                    | 0         | 0         | 0         | 0         |



| Animal ID | Pen ID | Dose | Season | Route  | Day | STEC O157 CFU counts | Strain C1 | Strain C2 | Strain B1 | Strain B2 |
|-----------|--------|------|--------|--------|-----|----------------------|-----------|-----------|-----------|-----------|
| T3        | 3      | High | Summer | Rectal | 1   | 25800                | 3         | 4         | 2         | 3         |
| T3        | 3      | High | Summer | Rectal | 3   | 201000               | 4         | 2         | 4         | 2         |
| T3        | 3      | High | Summer | Rectal | 7   | 300                  | 1         | 0         | 2         | 9         |
| T3        | 3      | High | Summer | Rectal | 14  | 15                   | 0         | 0         | 0         | 0         |
| T3        | 3      | High | Summer | Rectal | 21  | 1800                 | 0         | 0         | 0         | 12        |
| T3        | 3      | High | Summer | Rectal | 28  | 90                   | 0         | 0         | 0         | 2         |
| T3        | 3      | High | Summer | Rectal | 35  | 68                   | 0         | 0         | 0         | 3         |
| T3        | 3      | High | Summer | Rectal | 42  | 300                  | 0         | 0         | 0         | 2         |
| T3        | 3      | High | Summer | Rectal | 49  | 554                  | 0         | 0         | 0         | 12        |
| T3        | 3      | High | Summer | Rectal | 56  | 6300                 | 0         | 0         | 0         | 12        |
| T5        | 3      | High | Summer | Rectal | 0   | 0                    | 0         | 0         | 0         | 0         |
| T5        | 3      | High | Summer | Rectal | 1   | 6000                 | 3         | 7         | 2         | 0         |
| T5        | 3      | High | Summer | Rectal | 3   | 81000                | 0         | 6         | 3         | 3         |
| T5        | 3      | High | Summer | Rectal | 7   | 60000                | 0         | 11        | 0         | 1         |
| T5        | 3      | High | Summer | Rectal | 14  | 180                  | 5         | 0         | 0         | 0         |
| T5        | 3      | High | Summer | Rectal | 21  | 0                    | 0         | 0         | 0         | 0         |
| T5        | 3      | High | Summer | Rectal | 28  | 0                    | 0         | 0         | 0         | 0         |
| T5        | 3      | High | Summer | Rectal | 35  | 0                    | 0         | 0         | 0         | 0         |
| T5        | 3      | High | Summer | Rectal | 42  | 0                    | 0         | 0         | 0         | 0         |
| T5        | 3      | High | Summer | Rectal | 49  | 0                    | 0         | 0         | 0         | 0         |
| T5        | 3      | High | Summer | Rectal | 56  | 0                    | 0         | 0         | 0         | 0         |
| T7        | 5      | High | Summer | Rectal | 0   | 0                    | 0         | 0         | 0         | 0         |
| T7        | 5      | High | Summer | Rectal | 1   | 1500                 | 0         | 6         | 1         | 2         |
| T7        | 5      | High | Summer | Rectal | 3   | 2100                 | 0         | 1         | 1         | 4         |
| T7        | 5      | High | Summer | Rectal | 7   | 99000                | 0         | 0         | 1         | 10        |
| T7        | 5      | High | Summer | Rectal | 14  | 240                  | 0         | 0         | 3         | 5         |
| T7        | 5      | High | Summer | Rectal | 21  | 550                  | 4         | 1         | 0         | 5         |
| T7        | 5      | High | Summer | Rectal | 28  | 1200                 | 0         | 0         | 0         | 4         |
| T7        | 5      | High | Summer | Rectal | 35  | 54000                | 0         | 0         | 0         | 12        |
| T7        | 5      | High | Summer | Rectal | 42  | 600                  | 0         | 0         | 0         | 12        |
| T7        | 5      | High | Summer | Rectal | 49  | 15                   | 0         | 0         | 0         | 3         |
| T7        | 5      | High | Summer | Rectal | 56  | 30                   | 1         | 0         | 0         | 0         |
| T1        | 1      | High | Winter | Oral   | 0   | 0                    | 0         | 0         | 0         | 0         |
| T1        | 1      | High | Winter | Oral   | 1   | 6600                 | 3         | 0         | 7         | 2         |
| T1        | 1      | High | Winter | Oral   | 3   | 330                  | 1         | 0         | 3         | 6         |
| T1        | 1      | High | Winter | Oral   | 7   | 15                   | 3         | 0         | 0         | 0         |
| T1        | 1      | High | Winter | Oral   | 14  | 0                    | 0         | 0         | 0         | 0         |
| T1        | 1      | High | Winter | Oral   | 21  | 0                    | 0         | 0         | 0         | 0         |

| Animal ID | Pen ID | Dose | Season | Route | Day | STEC O157 CFU counts | Strain C1 | Strain C2 | Strain B1 | Strain B2 |
|-----------|--------|------|--------|-------|-----|----------------------|-----------|-----------|-----------|-----------|
| T1        | 1      | High | Winter | Oral  | 28  | 0                    | 0         | 0         | 0         | 0         |
| T1        | 1      | High | Winter | Oral  | 35  | 0                    | 0         | 0         | 0         | 0         |
| T1        | 1      | High | Winter | Oral  | 42  | 0                    | 0         | 0         | 0         | 0         |
| T1        | 1      | High | Winter | Oral  | 49  | 0                    | 0         | 0         | 0         | 0         |
| T1        | 1      | High | Winter | Oral  | 56  | 0                    | 0         | 0         | 0         | 0         |
| T10       | 2      | High | Winter | Oral  | 0   | 0                    | 0         | 0         | 0         | 0         |
| T10       | 2      | High | Winter | Oral  | 1   | 7200                 | 3         | 0         | 8         | 1         |
| T10       | 2      | High | Winter | Oral  | 3   | 45000                | 2         | 0         | 8         | 2         |
| T10       | 2      | High | Winter | Oral  | 7   | 15                   | 3         | 0         | 0         | 0         |
| T10       | 2      | High | Winter | Oral  | 14  | 0                    | 0         | 0         | 0         | 0         |
| T10       | 2      | High | Winter | Oral  | 21  | 0                    | 0         | 0         | 0         | 0         |
| T10       | 2      | High | Winter | Oral  | 28  | 0                    | 0         | 0         | 0         | 0         |
| T10       | 2      | High | Winter | Oral  | 35  | 0                    | 0         | 0         | 0         | 0         |
| T10       | 2      | High | Winter | Oral  | 42  | 0                    | 0         | 0         | 0         | 0         |
| T10       | 2      | High | Winter | Oral  | 49  | 0                    | 0         | 0         | 0         | 0         |
| T10       | 2      | High | Winter | Oral  | 56  | 0                    | 0         | 0         | 0         | 0         |
| T12       | 6      | High | Winter | Oral  | 0   | 0                    | 0         | 0         | 0         | 0         |
| T12       | 6      | High | Winter | Oral  | 1   | 49500                | 7         | 0         | 3         | 2         |
| T12       | 6      | High | Winter | Oral  | 3   | 1290000              | 5         | 0         | 4         | 3         |
| T12       | 6      | High | Winter | Oral  | 7   | 2400                 | 10        | 0         | 1         | 1         |
| T12       | 6      | High | Winter | Oral  | 14  | 30                   | 1         | 0         | 0         | 0         |
| T12       | 6      | High | Winter | Oral  | 21  | 0                    | 0         | 0         | 0         | 0         |
| T12       | 6      | High | Winter | Oral  | 28  | 0                    | 0         | 0         | 0         | 0         |
| T12       | 6      | High | Winter | Oral  | 35  | 0                    | 0         | 0         | 0         | 0         |
| T12       | 6      | High | Winter | Oral  | 42  | 0                    | 0         | 0         | 0         | 0         |
| T12       | 6      | High | Winter | Oral  | 49  | 0                    | 0         | 0         | 0         | 0         |
| T12       | 6      | High | Winter | Oral  | 56  | 0                    | 0         | 0         | 0         | 0         |
| T17       | 9      | High | Winter | Oral  | 0   | 60                   | 0         | 0         | 0         | 12        |
| T17       | 9      | High | Winter | Oral  | 1   | 11700                | 1         | 4         | 3         | 4         |
| T17       | 9      | High | Winter | Oral  | 3   | 7800                 | 2         | 0         | 3         | 7         |
| T17       | 9      | High | Winter | Oral  | 7   | 210                  | 0         | 0         | 0         | 6         |
| T17       | 9      | High | Winter | Oral  | 14  | 240                  | 0         | 0         | 0         | 9         |
| T17       | 9      | High | Winter | Oral  | 21  | 1310                 | 0         | 0         | 0         | 12        |
| T17       | 9      | High | Winter | Oral  | 28  | 41700                | 0         | 0         | 0         | 12        |
| T17       | 9      | High | Winter | Oral  | 35  | 1020                 | 0         | 0         | 0         | 12        |
| T17       | 9      | High | Winter | Oral  | 42  | 24300                | 0         | 0         | 0         | 12        |
| T17       | 9      | High | Winter | Oral  | 49  | 1260                 | 0         | 0         | 0         | 12        |
| T17       | 9      | High | Winter | Oral  | 56  | 1950                 | 0         | 0         | 0         | 12        |

| Animal ID | Pen ID | Dose | Season | Route | Day | STEC O157 CFU counts | Strain C1 | Strain C2 | Strain B1 | Strain B2 |
|-----------|--------|------|--------|-------|-----|----------------------|-----------|-----------|-----------|-----------|
| T2        | 2      | High | Winter | Oral  | 0   | 0                    | 0         | 0         | 0         | 0         |
| T2        | 2      | High | Winter | Oral  | 1   | 21300                | 5         | 0         | 6         | 1         |
| T2        | 2      | High | Winter | Oral  | 35  | 10800                | 12        | 0         | 0         | 0         |
| T2        | 2      | High | Winter | Oral  | 7   | 360                  | 12        | 0         | 0         | 0         |
| T2        | 2      | High | Winter | Oral  | 14  | 60                   | 3         | 0         | 0         | 0         |
| T2        | 2      | High | Winter | Oral  | 21  | 180                  | 6         | 0         | 0         | 0         |
| T2        | 2      | High | Winter | Oral  | 28  | 38700                | 12        | 0         | 0         | 0         |
| T2        | 2      | High | Winter | Oral  | 3   | 5610                 | 4         | 0         | 8         | 0         |
| T2        | 2      | High | Winter | Oral  | 42  | 2820                 | 12        | 0         | 0         | 0         |
| T2        | 2      | High | Winter | Oral  | 49  | 22200                | 12        | 0         | 0         | 0         |
| T2        | 2      | High | Winter | Oral  | 56  | 15                   | 3         | 0         | 0         | 0         |
| T20       | 9      | High | Winter | Oral  | 0   | 0                    | 0         | 0         | 0         | 0         |
| T20       | 9      | High | Winter | Oral  | 1   | 33900                | 5         | 0         | 3         | 4         |
| T20       | 9      | High | Winter | Oral  | 3   | 2310                 | 3         | 0         | 7         | 2         |
| T20       | 9      | High | Winter | Oral  | 7   | 630                  | 0         | 0         | 6         | 6         |
| T20       | 9      | High | Winter | Oral  | 14  | 15                   | 3         | 0         | 3         | 0         |
| T20       | 9      | High | Winter | Oral  | 21  | 15                   | 0         | 0         | 1         | 2         |
| T20       | 9      | High | Winter | Oral  | 28  | 15                   | 0         | 0         | 0         | 3         |
| T20       | 9      | High | Winter | Oral  | 35  | 930                  | 0         | 0         | 0         | 12        |
| T20       | 9      | High | Winter | Oral  | 42  | 4620                 | 0         | 0         | 0         | 12        |
| T20       | 9      | High | Winter | Oral  | 49  | 9900                 | 0         | 0         | 0         | 12        |
| T20       | 9      | High | Winter | Oral  | 56  | 2160                 | 0         | 0         | 0         | 12        |
| T4        | 4      | High | Winter | Oral  | 0   | 0                    | 0         | 0         | 0         | 0         |
| T4        | 4      | High | Winter | Oral  | 1   | 33000                | 4         | 0         | 5         | 3         |
| T4        | 4      | High | Winter | Oral  | 3   | 930000               | 4         | 2         | 5         | 1         |
| T4        | 4      | High | Winter | Oral  | 7   | 45900                | 6         | 0         | 0         | 6         |
| T4        | 4      | High | Winter | Oral  | 14  | 0                    | 0         | 0         | 0         | 0         |
| T4        | 4      | High | Winter | Oral  | 21  | 0                    | 0         | 0         | 0         | 0         |
| T4        | 4      | High | Winter | Oral  | 28  | 0                    | 0         | 0         | 0         | 0         |
| T4        | 4      | High | Winter | Oral  | 35  | 0                    | 0         | 0         | 0         | 0         |
| T4        | 4      | High | Winter | Oral  | 42  | 0                    | 0         | 0         | 0         | 0         |
| T4        | 4      | High | Winter | Oral  | 49  | 0                    | 0         | 0         | 0         | 0         |
| T4        | 4      | High | Winter | Oral  | 56  | 0                    | 0         | 0         | 0         | 0         |
| T6        | 4      | High | Winter | Oral  | 0   | 0                    | 0         | 0         | 0         | 0         |
| T6        | 4      | High | Winter | Oral  | 1   | 6600                 | 5         | 0         | 7         | 0         |
| T6        | 4      | High | Winter | Oral  | 3   | 45000                | 7         | 0         | 5         | 0         |
| T6        | 4      | High | Winter | Oral  | 7   | 10500                | 2         | 0         | 5         | 5         |
| T6        | 4      | High | Winter | Oral  | 14  | 330                  | 0         | 0         | 0         | 12        |

| Animal ID | Pen ID | Dose | Season | Route  | Day | STEC O157 CFU counts | Strain C1 | Strain C2 | Strain B1 | Strain B2 |
|-----------|--------|------|--------|--------|-----|----------------------|-----------|-----------|-----------|-----------|
| T6        | 4      | High | Winter | Oral   | 21  | 1120                 | 3         | 0         | 0         | 9         |
| T6        | 4      | High | Winter | Oral   | 28  | 210                  | 0         | 0         | 0         | 8         |
| T6        | 4      | High | Winter | Oral   | 35  | 630                  | 0         | 0         | 0         | 12        |
| T6        | 4      | High | Winter | Oral   | 42  | 133                  | 0         | 0         | 0         | 8         |
| T6        | 4      | High | Winter | Oral   | 49  | 0                    | 0         | 0         | 0         | 0         |
| T6        | 4      | High | Winter | Oral   | 56  | 0                    | 0         | 0         | 0         | 0         |
| T8        | 6      | High | Winter | Oral   | 0   | 0                    | 0         | 0         | 0         | 0         |
| T8        | 6      | High | Winter | Oral   | 1   | 16500                | 3         | 0         | 5         | 4         |
| T8        | 6      | High | Winter | Oral   | 3   | 1740000              | 4         | 1         | 2         | 5         |
| T8        | 6      | High | Winter | Oral   | 7   | 53400                | 11        | 0         | 0         | 1         |
| T8        | 6      | High | Winter | Oral   | 14  | 0                    | 0         | 0         | 0         | 0         |
| T8        | 6      | High | Winter | Oral   | 21  | 0                    | 0         | 0         | 0         | 0         |
| T8        | 6      | High | Winter | Oral   | 28  | 0                    | 0         | 0         | 0         | 0         |
| T8        | 6      | High | Winter | Oral   | 35  | 0                    | 0         | 0         | 0         | 0         |
| T8        | 6      | High | Winter | Oral   | 42  | 0                    | 0         | 0         | 0         | 0         |
| T8        | 6      | High | Winter | Oral   | 49  | 0                    | 0         | 0         | 0         | 0         |
| T8        | 6      | High | Winter | Oral   | 56  | 0                    | 0         | 0         | 0         | 0         |
| T9        | 1      | High | Winter | Oral   | 0   | 0                    | 0         | 0         | 0         | 0         |
| T9        | 1      | High | Winter | Oral   | 1   | 3960                 | 6         | 0         | 6         | 0         |
| T9        | 1      | High | Winter | Oral   | 3   | 1440000              | 5         | 0         | 7         | 0         |
| T9        | 1      | High | Winter | Oral   | 7   | 41100                | 5         | 0         | 0         | 7         |
| T9        | 1      | High | Winter | Oral   | 14  | 480                  | 11        | 0         | 1         | 0         |
| T9        | 1      | High | Winter | Oral   | 21  | 60                   | 2         | 0         | 0         | 0         |
| T9        | 1      | High | Winter | Oral   | 28  | 0                    | 0         | 0         | 0         | 0         |
| T9        | 1      | High | Winter | Oral   | 35  | 0                    | 0         | 0         | 0         | 0         |
| T9        | 1      | High | Winter | Oral   | 42  | 0                    | 0         | 0         | 0         | 0         |
| T9        | 1      | High | Winter | Oral   | 49  | 0                    | 0         | 0         | 0         | 0         |
| T9        | 1      | High | Winter | Oral   | 56  | 0                    | 0         | 0         | 0         | 0         |
| T11       | 7      | High | Winter | Rectal | 0   | 0                    | 0         | 0         | 0         | 0         |
| T11       | 7      | High | Winter | Rectal | 1   | 2370                 | 7         | 0         | 0         | 5         |
| T11       | 7      | High | Winter | Rectal | 3   | 2850                 | 2         | 4         | 3         | 3         |
| T11       | 7      | High | Winter | Rectal | 7   | 113                  | 1         | 0         | 0         | 2         |
| T11       | 7      | High | Winter | Rectal | 14  | 330                  | 0         | 6         | 0         | 0         |
| T11       | 7      | High | Winter | Rectal | 21  | 0                    | 0         | 0         | 0         | 0         |
| T11       | 7      | High | Winter | Rectal | 28  | 0                    | 0         | 0         | 0         | 0         |
| T11       | 7      | High | Winter | Rectal | 35  | 0                    | 0         | 0         | 0         | 0         |
| T11       | 7      | High | Winter | Rectal | 42  | 0                    | 0         | 0         | 0         | 0         |
| T11       | 7      | High | Winter | Rectal | 49  | 0                    | 0         | 0         | 0         | 0         |

| Animal ID | Pen ID | Dose | Season | Route  | Day | STEC O157 CFU counts | Strain C1 | Strain C2 | Strain B1 | Strain B2 |
|-----------|--------|------|--------|--------|-----|----------------------|-----------|-----------|-----------|-----------|
| T11       | 7      | High | Winter | Rectal | 56  | 0                    | 0         | 0         | 0         | 0         |
| T13       | 7      | High | Winter | Rectal | 0   | 0                    | 0         | 0         | 0         | 0         |
| T13       | 7      | High | Winter | Rectal | 1   | 228000               | 5         | 6         | 0         | 1         |
| T13       | 7      | High | Winter | Rectal | 3   | 63000                | 1         | 3         | 5         | 3         |
| T13       | 7      | High | Winter | Rectal | 7   | 450                  | 1         | 0         | 0         | 10        |
| T13       | 7      | High | Winter | Rectal | 14  | 60                   | 0         | 0         | 0         | 2         |
| T13       | 7      | High | Winter | Rectal | 21  | 420                  | 0         | 9         | 0         | 3         |
| T13       | 7      | High | Winter | Rectal | 28  | 30                   | 0         | 1         | 0         | 0         |
| T13       | 7      | High | Winter | Rectal | 35  | 15                   | 3         | 0         | 0         | 0         |
| T13       | 7      | High | Winter | Rectal | 42  | 15                   | 3         | 0         | 0         | 0         |
| T13       | 7      | High | Winter | Rectal | 49  | 15                   | 3         | 0         | 0         | 0         |
| T13       | 7      | High | Winter | Rectal | 56  | 0                    | 0         | 0         | 0         | 0         |
| T14       | 8      | High | Winter | Rectal | 0   | 0                    | 0         | 0         | 0         | 0         |
| T14       | 8      | High | Winter | Rectal | 1   | 64200                | 3         | 3         | 4         | 2         |
| T14       | 8      | High | Winter | Rectal | 3   | 57600                | 4         | 1         | 0         | 7         |
| T14       | 8      | High | Winter | Rectal | 7   | 28800                | 2         | 1         | 0         | 9         |
| T14       | 8      | High | Winter | Rectal | 14  | 60                   | 0         | 2         | 0         | 1         |
| T14       | 8      | High | Winter | Rectal | 21  | 3600                 | 0         | 0         | 0         | 12        |
| T14       | 8      | High | Winter | Rectal | 28  | 10800                | 0         | 0         | 0         | 12        |
| T14       | 8      | High | Winter | Rectal | 35  | 5700                 | 0         | 0         | 0         | 12        |
| T14       | 8      | High | Winter | Rectal | 42  | 1500                 | 0         | 0         | 0         | 12        |
| T14       | 8      | High | Winter | Rectal | 49  | 3600                 | 0         | 0         | 0         | 12        |
| T14       | 8      | High | Winter | Rectal | 56  | 1260                 | 0         | 0         | 0         | 12        |
| T15       | 5      | High | Winter | Rectal | 0   | 0                    | 0         | 0         | 0         | 0         |
| T15       | 5      | High | Winter | Rectal | 1   | 66000                | 2         | 3         | 2         | 5         |
| T15       | 5      | High | Winter | Rectal | 3   | 780000               | 3         | 5         | 0         | 4         |
| T15       | 5      | High | Winter | Rectal | 7   | 25500                | 1         | 0         | 3         | 8         |
| T15       | 5      | High | Winter | Rectal | 14  | 15                   | 0         | 3         | 0         | 0         |
| T15       | 5      | High | Winter | Rectal | 21  | 15                   | 0         | 0         | 0         | 3         |
| T15       | 5      | High | Winter | Rectal | 28  | 0                    | 0         | 0         | 0         | 0         |
| T15       | 5      | High | Winter | Rectal | 35  | 0                    | 0         | 0         | 0         | 0         |
| T15       | 5      | High | Winter | Rectal | 42  | 0                    | 0         | 0         | 0         | 0         |
| T15       | 5      | High | Winter | Rectal | 49  | 0                    | 0         | 0         | 0         | 0         |
| T15       | 5      | High | Winter | Rectal | 56  | 0                    | 0         | 0         | 0         | 0         |
| T16       | 8      | High | Winter | Rectal | 0   | 0                    | 0         | 0         | 0         | 0         |
| T16       | 8      | High | Winter | Rectal | 1   | 87000                | 4         | 2         | 1         | 5         |
| T16       | 8      | High | Winter | Rectal | 3   | 960000               | 5         | 1         | 1         | 5         |
| T16       | 8      | High | Winter | Rectal | 7   | 930                  | 6         | 2         | 1         | 3         |

| Animal ID | Pen ID | Dose | Season | Route  | Day | STEC O157 CFU counts | Strain C1 | Strain C2 | Strain B1 | Strain B2 |
|-----------|--------|------|--------|--------|-----|----------------------|-----------|-----------|-----------|-----------|
| T16       | 8      | High | Winter | Rectal | 14  | 15                   | 3         | 0         | 0         | 0         |
| T16       | 8      | High | Winter | Rectal | 21  | 8700                 | 12        | 0         | 0         | 0         |
| T16       | 8      | High | Winter | Rectal | 28  | 70800                | 12        | 0         | 0         | 0         |
| T16       | 8      | High | Winter | Rectal | 35  | 1800                 | 12        | 0         | 0         | 0         |
| T16       | 8      | High | Winter | Rectal | 42  | 1800                 | 12        | 0         | 0         | 0         |
| T16       | 8      | High | Winter | Rectal | 49  | 15                   | 3         | 0         | 0         | 0         |
| T16       | 8      | High | Winter | Rectal | 56  | 30                   | 1         | 0         | 0         | 0         |
| T18       | 10     | High | Winter | Rectal | 0   | 0                    | 0         | 0         | 0         | 0         |
| T18       | 10     | High | Winter | Rectal | 1   | 36300                | 4         | 0         | 7         | 1         |
| T18       | 10     | High | Winter | Rectal | 3   | 555000               | 2         | 0         | 1         | 9         |
| T18       | 10     | High | Winter | Rectal | 7   | 1140                 | 1         | 1         | 1         | 9         |
| T18       | 10     | High | Winter | Rectal | 14  | 390                  | 2         | 3         | 1         | 5         |
| T18       | 10     | High | Winter | Rectal | 21  | 180                  | 6         | 0         | 0         | 0         |
| T18       | 10     | High | Winter | Rectal | 28  | 15                   | 0         | 0         | 0         | 3         |
| T18       | 10     | High | Winter | Rectal | 35  | 0                    | 0         | 0         | 0         | 0         |
| T18       | 10     | High | Winter | Rectal | 42  | 0                    | 0         | 0         | 0         | 0         |
| T18       | 10     | High | Winter | Rectal | 49  | 0                    | 0         | 0         | 0         | 0         |
| T18       | 10     | High | Winter | Rectal | 56  | 0                    | 0         | 0         | 0         | 0         |
| T19       | 10     | High | Winter | Rectal | 0   | 0                    | 0         | 0         | 0         | 0         |
| T19       | 10     | High | Winter | Rectal | 1   | 55000                | 1         | 3         | 4         | 4         |
| T19       | 10     | High | Winter | Rectal | 3   | 1380000              | 1         | 3         | 0         | 8         |
| T19       | 10     | High | Winter | Rectal | 7   | 60                   | 0         | 1         | 0         | 0         |
| T19       | 10     | High | Winter | Rectal | 14  | 15                   | 0         | 0         | 0         | 2         |
| T19       | 10     | High | Winter | Rectal | 21  | 0                    | 0         | 0         | 0         | 0         |
| T19       | 10     | High | Winter | Rectal | 28  | 0                    | 0         | 0         | 0         | 0         |
| T19       | 10     | High | Winter | Rectal | 35  | 0                    | 0         | 0         | 0         | 0         |
| T19       | 10     | High | Winter | Rectal | 42  | 0                    | 0         | 0         | 0         | 0         |
| T19       | 10     | High | Winter | Rectal | 49  | 0                    | 0         | 0         | 0         | 0         |
| T19       | 10     | High | Winter | Rectal | 56  | 0                    | 0         | 0         | 0         | 0         |
| T3        | 3      | High | Winter | Rectal | 0   | 0                    | 0         | 0         | 0         | 0         |
| T3        | 3      | High | Winter | Rectal | 1   | 51300                | 4         | 3         | 0         | 5         |
| T3        | 3      | High | Winter | Rectal | 3   | 96000                | 6         | 0         | 1         | 5         |
| T3        | 3      | High | Winter | Rectal | 7   | 840                  | 0         | 8         | 1         | 3         |
| T3        | 3      | High | Winter | Rectal | 14  | 210                  | 0         | 0         | 0         | 7         |
| T3        | 3      | High | Winter | Rectal | 21  | 15                   | 0         | 0         | 0         | 3         |
| T3        | 3      | High | Winter | Rectal | 28  | 1800                 | 0         | 0         | 0         | 12        |
| T3        | 3      | High | Winter | Rectal | 35  | 60                   | 0         | 0         | 0         | 3         |
| T3        | 3      | High | Winter | Rectal | 42  | 360                  | 0         | 0         | 0         | 12        |

| Animal ID | Pen ID | Dose | Season | Route  | Day | STEC O157 CFU counts | Strain C1 | Strain C2 | Strain B1 | Strain B2 |
|-----------|--------|------|--------|--------|-----|----------------------|-----------|-----------|-----------|-----------|
| T3        | 3      | High | Winter | Rectal | 49  | 30                   | 0         | 0         | 0         | 2         |
| T3        | 3      | High | Winter | Rectal | 56  | 60                   | 0         | 0         | 0         | 2         |
| T5        | 3      | High | Winter | Rectal | 0   | 0                    | 0         | 0         | 0         | 0         |
| T5        | 3      | High | Winter | Rectal | 1   | 632                  | 1         | 2         | 1         | 8         |
| T5        | 3      | High | Winter | Rectal | 3   | 58800                | 3         | 1         | 4         | 4         |
| T5        | 3      | High | Winter | Rectal | 7   | 8700                 | 8         | 1         | 1         | 2         |
| T5        | 3      | High | Winter | Rectal | 14  | 300                  | 4         | 1         | 0         | 7         |
| T5        | 3      | High | Winter | Rectal | 21  | 0                    | 0         | 0         | 0         | 0         |
| T5        | 3      | High | Winter | Rectal | 28  | 0                    | 0         | 0         | 0         | 0         |
| T5        | 3      | High | Winter | Rectal | 35  | 0                    | 0         | 0         | 0         | 0         |
| T5        | 3      | High | Winter | Rectal | 42  | 0                    | 0         | 0         | 0         | 0         |
| T5        | 3      | High | Winter | Rectal | 49  | 0                    | 0         | 0         | 0         | 0         |
| T5        | 3      | High | Winter | Rectal | 56  | 0                    | 0         | 0         | 0         | 0         |
| T7        | 5      | High | Winter | Rectal | 0   | 0                    | 0         | 0         | 0         | 0         |
| T7        | 5      | High | Winter | Rectal | 1   | 42600                | 5         | 1         | 0         | 6         |
| T7        | 5      | High | Winter | Rectal | 3   | 3200000              | 6         | 0         | 0         | 6         |
| T7        | 5      | High | Winter | Rectal | 7   | 570                  | 1         | 1         | 2         | 8         |
| T7        | 5      | High | Winter | Rectal | 14  | 240                  | 4         | 2         | 1         | 1         |
| T7        | 5      | High | Winter | Rectal | 21  | 600                  | 5         | 0         | 1         | 0         |
| T7        | 5      | High | Winter | Rectal | 28  | 150                  | 4         | 4         | 0         | 0         |
| T7        | 5      | High | Winter | Rectal | 35  | 690                  | 7         | 2         | 2         | 1         |
| T7        | 5      | High | Winter | Rectal | 42  | 480                  | 0         | 7         | 4         | 1         |
| T7        | 5      | High | Winter | Rectal | 49  | 150                  | 0         | 2         | 0         | 3         |
| T7        | 5      | High | Winter | Rectal | 56  | 60                   | 2         | 0         | 0         | 0         |
| T11       | 7      | Low  | Summer | Oral   | 0   | 0                    | 0         | 0         | 0         | 0         |
| T11       | 7      | Low  | Summer | Oral   | 1   | 120                  | 2         | 0         | 2         | 0         |
| T11       | 7      | Low  | Summer | Oral   | 3   | 16800                | 3         | 0         | 2         | 7         |
| T11       | 7      | Low  | Summer | Oral   | 7   | 18300                | 2         | 0         | 10        | 0         |
| T11       | 7      | Low  | Summer | Oral   | 14  | 15                   | 3         | 0         | 0         | 0         |
| T11       | 7      | Low  | Summer | Oral   | 21  | 0                    | 0         | 0         | 0         | 0         |
| T11       | 7      | Low  | Summer | Oral   | 28  | 0                    | 0         | 0         | 0         | 0         |
| T11       | 7      | Low  | Summer | Oral   | 35  | 0                    | 0         | 0         | 0         | 0         |
| T11       | 7      | Low  | Summer | Oral   | 42  | 0                    | 0         | 0         | 0         | 0         |
| T11       | 7      | Low  | Summer | Oral   | 49  | 0                    | 0         | 0         | 0         | 0         |
| T11       | 7      | Low  | Summer | Oral   | 56  | 0                    | 0         | 0         | 0         | 0         |
| T13       | 7      | Low  | Summer | Oral   | 0   | 0                    | 0         | 0         | 0         | 0         |
| T13       | 7      | Low  | Summer | Oral   | 1   | 150                  | 4         | 0         | 1         | 0         |
| T13       | 7      | Low  | Summer | Oral   | 3   | 19500                | 10        | 0         | 2         | 0         |

| Animal ID | Pen ID | Dose | Season | Route | Day | STEC O157 CFU counts | Strain C1 | Strain C2 | Strain B1 | Strain B2 |
|-----------|--------|------|--------|-------|-----|----------------------|-----------|-----------|-----------|-----------|
| T13       | 7      | Low  | Summer | Oral  | 7   | 96000                | 2         | 0         | 10        | 0         |
| T13       | 7      | Low  | Summer | Oral  | 14  | 30                   | 1         | 0         | 0         | 0         |
| T13       | 7      | Low  | Summer | Oral  | 21  | 90                   | 0         | 1         | 2         | 0         |
| T13       | 7      | Low  | Summer | Oral  | 28  | 15                   | 2         | 0         | 1         | 0         |
| T13       | 7      | Low  | Summer | Oral  | 35  | 15                   | 3         | 0         | 0         | 0         |
| T13       | 7      | Low  | Summer | Oral  | 42  | 15                   | 3         | 0         | 0         | 0         |
| T13       | 7      | Low  | Summer | Oral  | 49  | 0                    | 0         | 0         | 0         | 0         |
| T13       | 7      | Low  | Summer | Oral  | 56  | 0                    | 0         | 0         | 0         | 0         |
| T14       | 8      | Low  | Summer | Oral  | 0   | 0                    | 0         | 0         | 0         | 0         |
| T14       | 8      | Low  | Summer | Oral  | 1   | 720                  | 8         | 0         | 4         | 0         |
| T14       | 8      | Low  | Summer | Oral  | 3   | 60                   | 0         | 0         | 2         | 0         |
| T14       | 8      | Low  | Summer | Oral  | 7   | 570                  | 0         | 0         | 12        | 0         |
| T14       | 8      | Low  | Summer | Oral  | 14  | 66000                | 0         | 0         | 12        | 0         |
| T14       | 8      | Low  | Summer | Oral  | 21  | 1170                 | 0         | 0         | 12        | 0         |
| T14       | 8      | Low  | Summer | Oral  | 28  | 1720                 | 0         | 0         | 12        | 0         |
| T14       | 8      | Low  | Summer | Oral  | 35  | 127                  | 0         | 0         | 12        | 0         |
| T14       | 8      | Low  | Summer | Oral  | 42  | 15                   | 3         | 0         | 0         | 0         |
| T14       | 8      | Low  | Summer | Oral  | 49  | 0                    | 0         | 0         | 0         | 0         |
| T14       | 8      | Low  | Summer | Oral  | 56  | 0                    | 0         | 0         | 0         | 0         |
| T15       | 5      | Low  | Summer | Oral  | 0   | 0                    | 0         | 0         | 0         | 0         |
| T15       | 5      | Low  | Summer | Oral  | 1   | 840                  | 3         | 0         | 7         | 2         |
| T15       | 5      | Low  | Summer | Oral  | 3   | 15300                | 10        | 0         | 2         | 0         |
| T15       | 5      | Low  | Summer | Oral  | 7   | 2220                 | 6         | 2         | 4         | 0         |
| T15       | 5      | Low  | Summer | Oral  | 14  | 15                   | 3         | 0         | 0         | 0         |
| T15       | 5      | Low  | Summer | Oral  | 21  | 0                    | 0         | 0         | 0         | 0         |
| T15       | 5      | Low  | Summer | Oral  | 28  | 15                   | 0         | 1         | 0         | 0         |
| T15       | 5      | Low  | Summer | Oral  | 35  | 15                   | 3         | 0         | 0         | 0         |
| T15       | 5      | Low  | Summer | Oral  | 42  | 0                    | 0         | 0         | 0         | 0         |
| T15       | 5      | Low  | Summer | Oral  | 49  | 0                    | 0         | 0         | 0         | 0         |
| T15       | 5      | Low  | Summer | Oral  | 56  | 0                    | 0         | 0         | 0         | 0         |
| T16       | 8      | Low  | Summer | Oral  | 0   | 0                    | 0         | 0         | 0         | 0         |
| T16       | 8      | Low  | Summer | Oral  | 1   | 90                   | 0         | 0         | 3         | 0         |
| T16       | 8      | Low  | Summer | Oral  | 3   | 27900                | 0         | 0         | 11        | 1         |
| T16       | 8      | Low  | Summer | Oral  | 7   | 7260                 | 1         | 2         | 9         | 0         |
| T16       | 8      | Low  | Summer | Oral  | 14  | 2010                 | 1         | 0         | 4         | 7         |
| T16       | 8      | Low  | Summer | Oral  | 21  | 0                    | 0         | 0         | 0         | 0         |
| T16       | 8      | Low  | Summer | Oral  | 28  | 0                    | 0         | 0         | 0         | 0         |
| T16       | 8      | Low  | Summer | Oral  | 35  | 0                    | 0         | 0         | 0         | 0         |



| Animal ID | Pen ID | Dose | Season | Route | Day | STEC O157 CFU counts | Strain C1 | Strain C2 | Strain B1 | Strain B2 |
|-----------|--------|------|--------|-------|-----|----------------------|-----------|-----------|-----------|-----------|
| T16       | 8      | Low  | Summer | Oral  | 42  | 0                    | 0         | 0         | 0         | 0         |
| T16       | 8      | Low  | Summer | Oral  | 49  | 0                    | 0         | 0         | 0         | 0         |
| T16       | 8      | Low  | Summer | Oral  | 56  | 0                    | 0         | 0         | 0         | 0         |
| T18       | 10     | Low  | Summer | Oral  | 0   | 0                    | 0         | 0         | 0         | 0         |
| T18       | 10     | Low  | Summer | Oral  | 1   | 330                  | 3         | 1         | 7         | 0         |
| T18       | 10     | Low  | Summer | Oral  | 3   | 3990                 | 6         | 1         | 5         | 0         |
| T18       | 10     | Low  | Summer | Oral  | 7   | 4950                 | 3         | 2         | 5         | 2         |
| T18       | 10     | Low  | Summer | Oral  | 14  | 0                    | 0         | 0         | 0         | 0         |
| T18       | 10     | Low  | Summer | Oral  | 21  | 0                    | 0         | 0         | 0         | 0         |
| T18       | 10     | Low  | Summer | Oral  | 28  | 0                    | 0         | 0         | 0         | 0         |
| T18       | 10     | Low  | Summer | Oral  | 35  | 0                    | 0         | 0         | 0         | 0         |
| T18       | 10     | Low  | Summer | Oral  | 42  | 0                    | 0         | 0         | 0         | 0         |
| T18       | 10     | Low  | Summer | Oral  | 49  | 0                    | 0         | 0         | 0         | 0         |
| T18       | 10     | Low  | Summer | Oral  | 56  | 0                    | 0         | 0         | 0         | 0         |
| T19       | 10     | Low  | Summer | Oral  | 0   | 15                   | 0         | 1         | 0         | 0         |
| T19       | 10     | Low  | Summer | Oral  | 1   | 210                  | 2         | 0         | 5         | 0         |
| T19       | 10     | Low  | Summer | Oral  | 3   | 15                   | 0         | 0         | 3         | 0         |
| T19       | 10     | Low  | Summer | Oral  | 7   | 0                    | 0         | 0         | 0         | 0         |
| T19       | 10     | Low  | Summer | Oral  | 14  | 0                    | 0         | 0         | 0         | 0         |
| T19       | 10     | Low  | Summer | Oral  | 21  | 0                    | 0         | 0         | 0         | 0         |
| T19       | 10     | Low  | Summer | Oral  | 28  | 0                    | 0         | 0         | 0         | 0         |
| T19       | 10     | Low  | Summer | Oral  | 35  | 0                    | 0         | 0         | 0         | 0         |
| T19       | 10     | Low  | Summer | Oral  | 42  | 0                    | 0         | 0         | 0         | 0         |
| T19       | 10     | Low  | Summer | Oral  | 49  | 0                    | 0         | 0         | 0         | 0         |
| T19       | 10     | Low  | Summer | Oral  | 56  | 0                    | 0         | 0         | 0         | 0         |
| T3        | 3      | Low  | Summer | Oral  | 0   | 0                    | 0         | 0         | 0         | 0         |
| T3        | 3      | Low  | Summer | Oral  | 1   | 125                  | 1         | 1         | 2         | 1         |
| T3        | 3      | Low  | Summer | Oral  | 7   | 9600                 | 0         | 0         | 12        | 0         |
| T3        | 3      | Low  | Summer | Oral  | 14  | 4890                 | 0         | 0         | 1         | 0         |
| T3        | 3      | Low  | Summer | Oral  | 21  | 30                   | 0         | 0         | 5         | 0         |
| T3        | 3      | Low  | Summer | Oral  | 28  | 30                   | 0         | 0         | 1         | 0         |
| T3        | 3      | Low  | Summer | Oral  | 3   | 30                   | 0         | 0         | 12        | 0         |
| T3        | 3      | Low  | Summer | Oral  | 35  | 627                  | 0         | 0         | 12        | 0         |
| T3        | 3      | Low  | Summer | Oral  | 42  | 0                    | 0         | 0         | 0         | 0         |
| T3        | 3      | Low  | Summer | Oral  | 49  | 0                    | 0         | 0         | 0         | 0         |
| T3        | 3      | Low  | Summer | Oral  | 56  | 0                    | 0         | 0         | 0         | 0         |
| T5        | 3      | Low  | Summer | Oral  | 0   | 0                    | 0         | 0         | 0         | 0         |
| T5        | 3      | Low  | Summer | Oral  | 1   | 154                  | 1         | 1         | 3         | 1         |

| Animal ID | Pen ID | Dose | Season | Route  | Day | STEC O157 CFU counts | Strain C1 | Strain C2 | Strain B1 | Strain B2 |
|-----------|--------|------|--------|--------|-----|----------------------|-----------|-----------|-----------|-----------|
| T5        | 3      | Low  | Summer | Oral   | 3   | 0                    | 0         | 0         | 0         | 0         |
| T5        | 3      | Low  | Summer | Oral   | 7   | 0                    | 0         | 0         | 0         | 0         |
| T5        | 3      | Low  | Summer | Oral   | 14  | 0                    | 0         | 0         | 0         | 0         |
| T5        | 3      | Low  | Summer | Oral   | 21  | 0                    | 0         | 0         | 0         | 0         |
| T5        | 3      | Low  | Summer | Oral   | 28  | 0                    | 0         | 0         | 0         | 0         |
| T5        | 3      | Low  | Summer | Oral   | 35  | 0                    | 0         | 0         | 0         | 0         |
| T5        | 3      | Low  | Summer | Oral   | 42  | 0                    | 0         | 0         | 0         | 0         |
| T5        | 3      | Low  | Summer | Oral   | 49  | 0                    | 0         | 0         | 0         | 0         |
| T5        | 3      | Low  | Summer | Oral   | 56  | 0                    | 0         | 0         | 0         | 0         |
| T7        | 5      | Low  | Summer | Oral   | 0   | 0                    | 0         | 0         | 0         | 0         |
| T7        | 5      | Low  | Summer | Oral   | 1   | 1770                 | 1         | 0         | 7         | 4         |
| T7        | 5      | Low  | Summer | Oral   | 3   | 30                   | 0         | 0         | 1         | 0         |
| T7        | 5      | Low  | Summer | Oral   | 7   | 0                    | 0         | 0         | 0         | 0         |
| T7        | 5      | Low  | Summer | Oral   | 14  | 0                    | 0         | 0         | 0         | 0         |
| T7        | 5      | Low  | Summer | Oral   | 21  | 0                    | 0         | 0         | 0         | 0         |
| T7        | 5      | Low  | Summer | Oral   | 28  | 0                    | 0         | 0         | 0         | 0         |
| T7        | 5      | Low  | Summer | Oral   | 35  | 0                    | 0         | 0         | 0         | 0         |
| T7        | 5      | Low  | Summer | Oral   | 42  | 0                    | 0         | 0         | 0         | 0         |
| T7        | 5      | Low  | Summer | Oral   | 49  | 0                    | 0         | 0         | 0         | 0         |
| T7        | 5      | Low  | Summer | Oral   | 56  | 0                    | 0         | 0         | 0         | 0         |
| T1        | 1      | Low  | Summer | Rectal | 0   | 0                    | 0         | 0         | 0         | 0         |
| T1        | 1      | Low  | Summer | Rectal | 1   | 7590                 | 0         | 4         | 2         | 6         |
| T1        | 1      | Low  | Summer | Rectal | 3   | 126000               | 0         | 5         | 0         | 7         |
| T1        | 1      | Low  | Summer | Rectal | 7   | 180                  | 0         | 6         | 0         | 0         |
| T1        | 1      | Low  | Summer | Rectal | 14  | 0                    | 0         | 0         | 0         | 0         |
| T1        | 1      | Low  | Summer | Rectal | 21  | 0                    | 0         | 0         | 0         | 0         |
| T1        | 1      | Low  | Summer | Rectal | 28  | 0                    | 0         | 0         | 3         | 0         |
| T1        | 1      | Low  | Summer | Rectal | 35  | 0                    | 0         | 0         | 0         | 0         |
| T1        | 1      | Low  | Summer | Rectal | 42  | 0                    | 0         | 0         | 0         | 0         |
| T1        | 1      | Low  | Summer | Rectal | 49  | 0                    | 0         | 0         | 0         | 0         |
| T1        | 1      | Low  | Summer | Rectal | 56  | 0                    | 0         | 0         | 0         | 0         |
| T10       | 2      | Low  | Summer | Rectal | 0   | 0                    | 0         | 0         | 0         | 0         |
| T10       | 2      | Low  | Summer | Rectal | 1   | 4890                 | 3         | 3         | 2         | 4         |
| T10       | 2      | Low  | Summer | Rectal | 3   | 303000               | 1         | 2         | 1         | 8         |
| T10       | 2      | Low  | Summer | Rectal | 7   | 207                  | 1         | 0         | 0         | 11        |
| T10       | 2      | Low  | Summer | Rectal | 14  | 30                   | 0         | 0         | 0         | 1         |
| T10       | 2      | Low  | Summer | Rectal | 21  | 0                    | 0         | 0         | 0         | 0         |
| T10       | 2      | Low  | Summer | Rectal | 28  | 0                    | 0         | 0         | 0         | 0         |

| Animal ID | Pen ID | Dose | Season | Route  | Day | STEC O157 CFU counts | Strain C1 | Strain C2 | Strain B1 | Strain B2 |
|-----------|--------|------|--------|--------|-----|----------------------|-----------|-----------|-----------|-----------|
| T10       | 2      | Low  | Summer | Rectal | 35  | 0                    | 0         | 0         | 0         | 0         |
| T10       | 2      | Low  | Summer | Rectal | 42  | 0                    | 0         | 0         | 0         | 0         |
| T10       | 2      | Low  | Summer | Rectal | 49  | 0                    | 0         | 0         | 0         | 0         |
| T10       | 2      | Low  | Summer | Rectal | 56  | 0                    | 0         | 0         | 0         | 0         |
| T12       | 6      | Low  | Summer | Rectal | 0   | 0                    | 0         | 0         | 0         | 0         |
| T12       | 6      | Low  | Summer | Rectal | 1   | 2900                 | 3         | 7         | 1         | 1         |
| T12       | 6      | Low  | Summer | Rectal | 3   | 50100                | 2         | 1         | 0         | 9         |
| T12       | 6      | Low  | Summer | Rectal | 7   | 28500                | 3         | 0         | 0         | 9         |
| T12       | 6      | Low  | Summer | Rectal | 14  | 90                   | 0         | 1         | 0         | 9         |
| T12       | 6      | Low  | Summer | Rectal | 21  | 150                  | 0         | 0         | 0         | 6         |
| T12       | 6      | Low  | Summer | Rectal | 28  | 0                    | 0         | 0         | 0         | 0         |
| T12       | 6      | Low  | Summer | Rectal | 35  | 0                    | 0         | 0         | 0         | 0         |
| T12       | 6      | Low  | Summer | Rectal | 42  | 0                    | 0         | 0         | 0         | 0         |
| T12       | 6      | Low  | Summer | Rectal | 49  | 0                    | 0         | 0         | 0         | 0         |
| T12       | 6      | Low  | Summer | Rectal | 56  | 0                    | 0         | 0         | 0         | 0         |
| T17       | 9      | Low  | Summer | Rectal | 0   | 300                  | 10        | 0         | 0         | 0         |
| T17       | 9      | Low  | Summer | Rectal | 1   | 1470                 | 9         | 2         | 0         | 1         |
| T17       | 9      | Low  | Summer | Rectal | 3   | 220                  | 1         | 0         | 0         | 3         |
| T17       | 9      | Low  | Summer | Rectal | 7   | 90                   | 0         | 0         | 0         | 3         |
| T17       | 9      | Low  | Summer | Rectal | 14  | 210                  | 0         | 0         | 0         | 7         |
| T17       | 9      | Low  | Summer | Rectal | 21  | 90                   | 0         | 0         | 0         | 3         |
| T17       | 9      | Low  | Summer | Rectal | 28  | 30                   | 0         | 0         | 0         | 3         |
| T17       | 9      | Low  | Summer | Rectal | 35  | 15                   | 0         | 0         | 0         | 3         |
| T17       | 9      | Low  | Summer | Rectal | 42  | 0                    | 0         | 0         | 0         | 0         |
| T17       | 9      | Low  | Summer | Rectal | 49  | 15                   | 2         | 0         | 0         | 0         |
| T17       | 9      | Low  | Summer | Rectal | 56  | 0                    | 0         | 0         | 0         | 0         |
| T2        | 2      | Low  | Summer | Rectal | 0   | 15                   | 0         | 8         | 0         | 0         |
| T2        | 2      | Low  | Summer | Rectal | 1   | 570                  | 0         | 10        | 0         | 2         |
| T2        | 2      | Low  | Summer | Rectal | 3   | 720                  | 0         | 12        | 0         | 0         |
| T2        | 2      | Low  | Summer | Rectal | 7   | 60                   | 0         | 2         | 0         | 0         |
| T2        | 2      | Low  | Summer | Rectal | 14  | 0                    | 0         | 0         | 0         | 0         |
| T2        | 2      | Low  | Summer | Rectal | 21  | 0                    | 0         | 0         | 0         | 0         |
| T2        | 2      | Low  | Summer | Rectal | 28  | 0                    | 0         | 0         | 0         | 0         |
| T2        | 2      | Low  | Summer | Rectal | 35  | 0                    | 0         | 0         | 0         | 0         |
| T2        | 2      | Low  | Summer | Rectal | 42  | 0                    | 0         | 0         | 0         | 0         |
| T2        | 2      | Low  | Summer | Rectal | 49  | 0                    | 0         | 0         | 0         | 0         |
| T2        | 2      | Low  | Summer | Rectal | 56  | 0                    | 0         | 0         | 0         | 0         |
| T20       | 9      | Low  | Summer | Rectal | 0   | 0                    | 0         | 0         | 0         | 0         |

| Animal ID | Pen ID | Dose | Season | Route  | Day | STEC O157 CFU counts | Strain C1 | Strain C2 | Strain B1 | Strain B2 |
|-----------|--------|------|--------|--------|-----|----------------------|-----------|-----------|-----------|-----------|
| T20       | 9      | Low  | Summer | Rectal | 1   | 17100                | 3         | 2         | 1         | 6         |
| T20       | 9      | Low  | Summer | Rectal | 3   | 189000               | 0         | 1         | 2         | 9         |
| T20       | 9      | Low  | Summer | Rectal | 7   | 3930                 | 10        | 0         | 0         | 2         |
| T20       | 9      | Low  | Summer | Rectal | 14  | 330                  | 11        | 0         | 0         | 0         |
| T20       | 9      | Low  | Summer | Rectal | 21  | 0                    | 0         | 0         | 0         | 0         |
| T20       | 9      | Low  | Summer | Rectal | 28  | 0                    | 0         | 0         | 0         | 0         |
| T20       | 9      | Low  | Summer | Rectal | 35  | 0                    | 0         | 0         | 0         | 0         |
| T20       | 9      | Low  | Summer | Rectal | 42  | 0                    | 0         | 0         | 0         | 0         |
| T20       | 9      | Low  | Summer | Rectal | 49  | 0                    | 0         | 0         | 0         | 0         |
| T20       | 9      | Low  | Summer | Rectal | 56  | 0                    | 0         | 0         | 0         | 0         |
| T4        | 4      | Low  | Summer | Rectal | 0   | 0                    | 0         | 0         | 0         | 0         |
| T4        | 4      | Low  | Summer | Rectal | 1   | 90                   | 3         | 0         | 0         | 0         |
| T4        | 4      | Low  | Summer | Rectal | 3   | 0                    | 0         | 0         | 0         | 0         |
| T4        | 4      | Low  | Summer | Rectal | 7   | 15                   | 0         | 0         | 0         | 3         |
| T4        | 4      | Low  | Summer | Rectal | 14  | 14400                | 0         | 0         | 0         | 12        |
| T4        | 4      | Low  | Summer | Rectal | 21  | 64200                | 0         | 0         | 0         | 12        |
| T4        | 4      | Low  | Summer | Rectal | 28  | 0                    | 0         | 0         | 0         | 0         |
| T4        | 4      | Low  | Summer | Rectal | 35  | 0                    | 0         | 0         | 0         | 0         |
| T4        | 4      | Low  | Summer | Rectal | 42  | 0                    | 0         | 0         | 0         | 0         |
| T4        | 4      | Low  | Summer | Rectal | 49  | 0                    | 0         | 0         | 0         | 0         |
| T4        | 4      | Low  | Summer | Rectal | 56  | 0                    | 0         | 0         | 0         | 0         |
| T6        | 4      | Low  | Summer | Rectal | 0   | 0                    | 0         | 0         | 0         | 0         |
| T6        | 4      | Low  | Summer | Rectal | 1   | 1890                 | 6         | 0         | 5         | 1         |
| T6        | 4      | Low  | Summer | Rectal | 3   | 14700                | 9         | 2         | 1         | 0         |
| T6        | 4      | Low  | Summer | Rectal | 7   | 7710                 | 2         | 6         | 1         | 3         |
| T6        | 4      | Low  | Summer | Rectal | 14  | 0                    | 0         | 0         | 0         | 0         |
| T6        | 4      | Low  | Summer | Rectal | 21  | 0                    | 0         | 0         | 0         | 0         |
| T6        | 4      | Low  | Summer | Rectal | 28  | 0                    | 0         | 0         | 0         | 0         |
| T6        | 4      | Low  | Summer | Rectal | 35  | 0                    | 0         | 0         | 0         | 0         |
| T6        | 4      | Low  | Summer | Rectal | 42  | 0                    | 0         | 0         | 0         | 0         |
| T6        | 4      | Low  | Summer | Rectal | 49  | 0                    | 0         | 0         | 0         | 0         |
| T6        | 4      | Low  | Summer | Rectal | 56  | 0                    | 0         | 0         | 0         | 0         |
| T8        | 6      | Low  | Summer | Rectal | 0   | 0                    | 0         | 0         | 0         | 0         |
| T8        | 6      | Low  | Summer | Rectal | 1   | 9000                 | 6         | 2         | 1         | 3         |
| T8        | 6      | Low  | Summer | Rectal | 3   | 96000                | 8         | 1         | 0         | 3         |
| T8        | 6      | Low  | Summer | Rectal | 7   | 2520                 | 6         | 0         | 0         | 6         |
| T8        | 6      | Low  | Summer | Rectal | 14  | 0                    | 0         | 0         | 0         | 0         |
| T8        | 6      | Low  | Summer | Rectal | 21  | 0                    | 0         | 0         | 0         | 0         |

| Animal ID | Pen ID | Dose | Season | Route  | Day | STEC O157 CFU counts | Strain C1 | Strain C2 | Strain B1 | Strain B2 |
|-----------|--------|------|--------|--------|-----|----------------------|-----------|-----------|-----------|-----------|
| T8        | 6      | Low  | Summer | Rectal | 28  | 0                    | 0         | 0         | 0         | 0         |
| T8        | 6      | Low  | Summer | Rectal | 35  | 0                    | 0         | 0         | 0         | 0         |
| T8        | 6      | Low  | Summer | Rectal | 42  | 0                    | 0         | 0         | 0         | 0         |
| T8        | 6      | Low  | Summer | Rectal | 49  | 0                    | 0         | 0         | 0         | 0         |
| T8        | 6      | Low  | Summer | Rectal | 56  | 0                    | 0         | 0         | 0         | 0         |
| T9        | 1      | Low  | Summer | Rectal | 0   | 0                    | 0         | 0         | 0         | 0         |
| T9        | 1      | Low  | Summer | Rectal | 1   | 600                  | 1         | 0         | 0         | 0         |
| T9        | 1      | Low  | Summer | Rectal | 3   | 5190                 | 6         | 6         | 0         | 0         |
| T9        | 1      | Low  | Summer | Rectal | 7   | 201                  | 8         | 4         | 0         | 0         |
| T9        | 1      | Low  | Summer | Rectal | 14  | 6600                 | 12        | 0         | 0         | 0         |
| T9        | 1      | Low  | Summer | Rectal | 21  | 60                   | 1         | 1         | 0         | 0         |
| T9        | 1      | Low  | Summer | Rectal | 28  | 15                   | 0         | 3         | 0         | 0         |
| T9        | 1      | Low  | Summer | Rectal | 35  | 15                   | 3         | 0         | 0         | 0         |
| T9        | 1      | Low  | Summer | Rectal | 42  | 0                    | 0         | 0         | 0         | 0         |
| T9        | 1      | Low  | Summer | Rectal | 49  | 0                    | 0         | 0         | 0         | 0         |
| T9        | 1      | Low  | Summer | Rectal | 56  | 0                    | 0         | 0         | 0         | 0         |
| T11       | 7      | Low  | Winter | Oral   | 0   | 0                    | 0         | 0         | 0         | 0         |
| T11       | 7      | Low  | Winter | Oral   | 1   | 210                  | 2         | 0         | 5         | 0         |
| T11       | 7      | Low  | Winter | Oral   | 3   | 195000               | 5         | 0         | 7         | 0         |
| T11       | 7      | Low  | Winter | Oral   | 7   | 240                  | 1         | 0         | 4         | 3         |
| T11       | 7      | Low  | Winter | Oral   | 14  | 0                    | 0         | 0         | 0         | 0         |
| T11       | 7      | Low  | Winter | Oral   | 21  | 0                    | 0         | 0         | 0         | 0         |
| T11       | 7      | Low  | Winter | Oral   | 28  | 0                    | 0         | 0         | 0         | 0         |
| T11       | 7      | Low  | Winter | Oral   | 35  | 0                    | 0         | 0         | 0         | 0         |
| T11       | 7      | Low  | Winter | Oral   | 42  | 0                    | 0         | 0         | 0         | 0         |
| T11       | 7      | Low  | Winter | Oral   | 49  | 0                    | 0         | 0         | 0         | 0         |
| T11       | 7      | Low  | Winter | Oral   | 56  | 0                    | 0         | 0         | 0         | 0         |
| T13       | 7      | Low  | Winter | Oral   | 0   | 15                   | 0         | 0         | 0         | 3         |
| T13       | 7      | Low  | Winter | Oral   | 1   | 180                  | 2         | 0         | 4         | 0         |
| T13       | 7      | Low  | Winter | Oral   | 3   | 150000               | 5         | 0         | 7         | 0         |
| T13       | 7      | Low  | Winter | Oral   | 7   | 720                  | 9         | 0         | 2         | 1         |
| T13       | 7      | Low  | Winter | Oral   | 14  | 0                    | 0         | 0         | 0         | 0         |
| T13       | 7      | Low  | Winter | Oral   | 21  | 15                   | 0         | 0         | 3         | 0         |
| T13       | 7      | Low  | Winter | Oral   | 28  | 120                  | 0         | 3         | 0         | 0         |
| T13       | 7      | Low  | Winter | Oral   | 35  | 0                    | 0         | 0         | 0         | 0         |
| T13       | 7      | Low  | Winter | Oral   | 42  | 0                    | 0         | 0         | 0         | 0         |
| T13       | 7      | Low  | Winter | Oral   | 49  | 0                    | 0         | 0         | 0         | 0         |
| T13       | 7      | Low  | Winter | Oral   | 56  | 0                    | 0         | 0         | 0         | 0         |

| Animal ID | Pen ID | Dose | Season | Route | Day | STEC O157 CFU counts | Strain C1 | Strain C2 | Strain B1 | Strain B2 |
|-----------|--------|------|--------|-------|-----|----------------------|-----------|-----------|-----------|-----------|
| T14       | 8      | Low  | Winter | Oral  | 0   | 0                    | 0         | 0         | 0         | 0         |
| T14       | 8      | Low  | Winter | Oral  | 1   | 1860                 | 8         | 1         | 2         | 1         |
| T14       | 8      | Low  | Winter | Oral  | 3   | 171000               | 5         | 1         | 5         | 1         |
| T14       | 8      | Low  | Winter | Oral  | 7   | 29700                | 1         | 2         | 0         | 9         |
| T14       | 8      | Low  | Winter | Oral  | 14  | 120                  | 0         | 0         | 0         | 4         |
| T14       | 8      | Low  | Winter | Oral  | 21  | 270                  | 0         | 0         | 1         | 8         |
| T14       | 8      | Low  | Winter | Oral  | 28  | 3660                 | 0         | 0         | 0         | 12        |
| T14       | 8      | Low  | Winter | Oral  | 35  | 2260                 | 0         | 0         | 0         | 12        |
| T14       | 8      | Low  | Winter | Oral  | 42  | 4200                 | 0         | 0         | 0         | 12        |
| T14       | 8      | Low  | Winter | Oral  | 49  | 7200                 | 0         | 0         | 0         | 12        |
| T14       | 8      | Low  | Winter | Oral  | 56  | 630                  | 0         | 0         | 0         | 12        |
| T15       | 5      | Low  | Winter | Oral  | 0   | 0                    | 0         | 0         | 0         | 0         |
| T15       | 5      | Low  | Winter | Oral  | 1   | 1020                 | 4         | 0         | 7         | 1         |
| T15       | 5      | Low  | Winter | Oral  | 3   | 156000               | 7         | 1         | 4         | 0         |
| T15       | 5      | Low  | Winter | Oral  | 7   | 15                   | 1         | 2         | 0         | 0         |
| T15       | 5      | Low  | Winter | Oral  | 14  | 15                   | 0         | 0         | 0         | 3         |
| T15       | 5      | Low  | Winter | Oral  | 21  | 15                   | 0         | 0         | 0         | 3         |
| T15       | 5      | Low  | Winter | Oral  | 28  | 0                    | 0         | 0         | 0         | 0         |
| T15       | 5      | Low  | Winter | Oral  | 35  | 0                    | 0         | 0         | 0         | 0         |
| T15       | 5      | Low  | Winter | Oral  | 42  | 0                    | 0         | 0         | 0         | 0         |
| T15       | 5      | Low  | Winter | Oral  | 49  | 0                    | 0         | 0         | 0         | 0         |
| T15       | 5      | Low  | Winter | Oral  | 56  | 0                    | 0         | 0         | 0         | 0         |
| T16       | 8      | Low  | Winter | Oral  | 0   | 0                    | 0         | 0         | 0         | 0         |
| T16       | 8      | Low  | Winter | Oral  | 1   | 2070                 | 7         | 0         | 3         | 2         |
| T16       | 8      | Low  | Winter | Oral  | 3   | 513000               | 3         | 0         | 8         | 1         |
| T16       | 8      | Low  | Winter | Oral  | 7   | 240                  | 1         | 0         | 0         | 7         |
| T16       | 8      | Low  | Winter | Oral  | 14  | 0                    | 0         | 0         | 0         | 0         |
| T16       | 8      | Low  | Winter | Oral  | 21  | 0                    | 0         | 0         | 0         | 0         |
| T16       | 8      | Low  | Winter | Oral  | 28  | 0                    | 0         | 0         | 0         | 0         |
| T16       | 8      | Low  | Winter | Oral  | 35  | 0                    | 0         | 0         | 0         | 0         |
| T16       | 8      | Low  | Winter | Oral  | 42  | 0                    | 0         | 0         | 0         | 0         |
| T16       | 8      | Low  | Winter | Oral  | 49  | 0                    | 0         | 0         | 0         | 0         |
| T16       | 8      | Low  | Winter | Oral  | 56  | 0                    | 0         | 0         | 0         | 0         |
| T18       | 10     | Low  | Winter | Oral  | 0   | 0                    | 0         | 0         | 0         | 0         |
| T18       | 10     | Low  | Winter | Oral  | 1   | 306000               | 6         | 0         | 6         | 0         |
| T18       | 10     | Low  | Winter | Oral  | 3   | 7800                 | 6         | 0         | 6         | 0         |
| T18       | 10     | Low  | Winter | Oral  | 7   | 3135                 | 2         | 0         | 10        | 0         |
| T18       | 10     | Low  | Winter | Oral  | 14  | 0                    | 0         | 0         | 0         | 0         |

| Animal ID | Pen ID | Dose | Season | Route | Day | STEC O157 CFU counts | Strain C1 | Strain C2 | Strain B1 | Strain B2 |
|-----------|--------|------|--------|-------|-----|----------------------|-----------|-----------|-----------|-----------|
| T18       | 10     | Low  | Winter | Oral  | 21  | 0                    | 0         | 0         | 0         | 0         |
| T18       | 10     | Low  | Winter | Oral  | 28  | 0                    | 0         | 0         | 0         | 0         |
| T18       | 10     | Low  | Winter | Oral  | 35  | 0                    | 0         | 0         | 0         | 0         |
| T18       | 10     | Low  | Winter | Oral  | 42  | 0                    | 0         | 0         | 0         | 0         |
| T18       | 10     | Low  | Winter | Oral  | 49  | 0                    | 0         | 0         | 0         | 0         |
| T18       | 10     | Low  | Winter | Oral  | 56  | 0                    | 0         | 0         | 0         | 0         |
| T19       | 10     | Low  | Winter | Oral  | 0   | 0                    | 0         | 0         | 0         | 0         |
| T19       | 10     | Low  | Winter | Oral  | 1   | 1080                 | 7         | 0         | 5         | 0         |
| T19       | 10     | Low  | Winter | Oral  | 3   | 2670                 | 5         | 0         | 7         | 0         |
| T19       | 10     | Low  | Winter | Oral  | 7   | 390                  | 6         | 0         | 6         | 0         |
| T19       | 10     | Low  | Winter | Oral  | 14  | 0                    | 0         | 0         | 0         | 0         |
| T19       | 10     | Low  | Winter | Oral  | 21  | 0                    | 0         | 0         | 0         | 0         |
| T19       | 10     | Low  | Winter | Oral  | 28  | 0                    | 0         | 0         | 0         | 0         |
| T19       | 10     | Low  | Winter | Oral  | 35  | 0                    | 0         | 0         | 0         | 0         |
| T19       | 10     | Low  | Winter | Oral  | 42  | 0                    | 0         | 0         | 0         | 0         |
| T19       | 10     | Low  | Winter | Oral  | 49  | 0                    | 0         | 0         | 0         | 0         |
| T19       | 10     | Low  | Winter | Oral  | 56  | 0                    | 0         | 0         | 0         | 0         |
| T3        | 3      | Low  | Winter | Oral  | 0   | 0                    | 0         | 0         | 0         | 0         |
| T3        | 3      | Low  | Winter | Oral  | 1   | 6510                 | 3         | 0         | 9         | 0         |
| T3        | 3      | Low  | Winter | Oral  | 3   | 47100                | 6         | 0         | 5         | 1         |
| T3        | 3      | Low  | Winter | Oral  | 7   | 15                   | 1         | 0         | 0         | 2         |
| T3        | 3      | Low  | Winter | Oral  | 14  | 0                    | 0         | 0         | 0         | 0         |
| T3        | 3      | Low  | Winter | Oral  | 21  | 0                    | 0         | 0         | 0         | 0         |
| T3        | 3      | Low  | Winter | Oral  | 28  | 0                    | 0         | 0         | 0         | 0         |
| T3        | 3      | Low  | Winter | Oral  | 35  | 0                    | 0         | 0         | 0         | 0         |
| T3        | 3      | Low  | Winter | Oral  | 42  | 0                    | 0         | 0         | 0         | 0         |
| T3        | 3      | Low  | Winter | Oral  | 49  | 0                    | 0         | 0         | 0         | 0         |
| T3        | 3      | Low  | Winter | Oral  | 56  | 0                    | 0         | 0         | 0         | 0         |
| T5        | 3      | Low  | Winter | Oral  | 0   | 0                    | 0         | 0         | 0         | 0         |
| T5        | 3      | Low  | Winter | Oral  | 1   | 150                  | 1         | 0         | 4         | 0         |
| T5        | 3      | Low  | Winter | Oral  | 3   | 418                  | 12        | 0         | 0         | 0         |
| T5        | 3      | Low  | Winter | Oral  | 7   | 43800                | 12        | 0         | 0         | 0         |
| T5        | 3      | Low  | Winter | Oral  | 14  | 570                  | 12        | 0         | 0         | 0         |
| T5        | 3      | Low  | Winter | Oral  | 21  | 0                    | 0         | 0         | 0         | 0         |
| T5        | 3      | Low  | Winter | Oral  | 28  | 0                    | 0         | 0         | 0         | 0         |
| T5        | 3      | Low  | Winter | Oral  | 35  | 0                    | 0         | 0         | 0         | 0         |
| T5        | 3      | Low  | Winter | Oral  | 42  | 0                    | 0         | 0         | 0         | 0         |
| T5        | 3      | Low  | Winter | Oral  | 49  | 0                    | 0         | 0         | 0         | 0         |

| Animal ID | Pen ID | Dose | Season | Route  | Day | STEC O157 CFU counts | Strain C1 | Strain C2 | Strain B1 | Strain B2 |
|-----------|--------|------|--------|--------|-----|----------------------|-----------|-----------|-----------|-----------|
| T5        | 3      | Low  | Winter | Oral   | 56  | 0                    | 0         | 0         | 0         | 0         |
| T7        | 5      | Low  | Winter | Oral   | 0   | 0                    | 0         | 0         | 0         | 0         |
| T7        | 5      | Low  | Winter | Oral   | 1   | 5100                 | 3         | 0         | 5         | 4         |
| T7        | 5      | Low  | Winter | Oral   | 3   | 49200                | 0         | 0         | 0         | 12        |
| T7        | 5      | Low  | Winter | Oral   | 7   | 17100                | 6         | 0         | 0         | 6         |
| T7        | 5      | Low  | Winter | Oral   | 14  | 120                  | 1         | 0         | 0         | 3         |
| T7        | 5      | Low  | Winter | Oral   | 21  | 60                   | 1         | 0         | 0         | 1         |
| T7        | 5      | Low  | Winter | Oral   | 28  | 15                   | 3         | 0         | 0         | 0         |
| T7        | 5      | Low  | Winter | Oral   | 35  | 15                   | 3         | 0         | 0         | 0         |
| T7        | 5      | Low  | Winter | Oral   | 42  | 0                    | 0         | 0         | 0         | 0         |
| T7        | 5      | Low  | Winter | Oral   | 49  | 0                    | 0         | 0         | 0         | 0         |
| T7        | 5      | Low  | Winter | Oral   | 56  | 0                    | 0         | 0         | 0         | 0         |
| T1        | 1      | Low  | Winter | Rectal | 0   | 0                    | 0         | 0         | 0         | 0         |
| T1        | 1      | Low  | Winter | Rectal | 1   | 3720                 | 3         | 0         | 5         | 4         |
| T1        | 1      | Low  | Winter | Rectal | 3   | 4950                 | 1         | 5         | 1         | 5         |
| T1        | 1      | Low  | Winter | Rectal | 7   | 30                   | 1         | 0         | 0         | 0         |
| T1        | 1      | Low  | Winter | Rectal | 14  | 15                   | 0         | 0         | 0         | 3         |
| T1        | 1      | Low  | Winter | Rectal | 21  | 15                   | 0         | 2         | 0         | 1         |
| T1        | 1      | Low  | Winter | Rectal | 28  | 15                   | 0         | 2         | 1         | 0         |
| T1        | 1      | Low  | Winter | Rectal | 35  | 15                   | 0         | 3         | 0         | 0         |
| T1        | 1      | Low  | Winter | Rectal | 42  | 0                    | 0         | 0         | 0         | 0         |
| T1        | 1      | Low  | Winter | Rectal | 49  | 15                   | 0         | 3         | 0         | 0         |
| T1        | 1      | Low  | Winter | Rectal | 56  | 15                   | 0         | 3         | 0         | 0         |
| T10       | 2      | Low  | Winter | Rectal | 0   | 0                    | 0         | 0         | 0         | 0         |
| T10       | 2      | Low  | Winter | Rectal | 1   | 3570                 | 4         | 2         | 1         | 5         |
| T10       | 2      | Low  | Winter | Rectal | 3   | 84000                | 0         | 1         | 1         | 10        |
| T10       | 2      | Low  | Winter | Rectal | 7   | 30                   | 0         | 1         | 0         | 0         |
| T10       | 2      | Low  | Winter | Rectal | 14  | 0                    | 0         | 0         | 0         | 0         |
| T10       | 2      | Low  | Winter | Rectal | 21  | 0                    | 0         | 0         | 0         | 0         |
| T10       | 2      | Low  | Winter | Rectal | 28  | 0                    | 0         | 0         | 0         | 0         |
| T10       | 2      | Low  | Winter | Rectal | 35  | 0                    | 0         | 0         | 0         | 0         |
| T10       | 2      | Low  | Winter | Rectal | 42  | 0                    | 0         | 0         | 0         | 0         |
| T10       | 2      | Low  | Winter | Rectal | 49  | 0                    | 0         | 0         | 0         | 0         |
| T10       | 2      | Low  | Winter | Rectal | 56  | 0                    | 0         | 0         | 0         | 0         |
| T12       | 6      | Low  | Winter | Rectal | 0   | 0                    | 0         | 0         | 0         | 0         |
| T12       | 6      | Low  | Winter | Rectal | 1   | 780                  | 6         | 2         | 1         | 3         |
| T12       | 6      | Low  | Winter | Rectal | 3   | 51600                | 2         | 3         | 5         | 2         |
| T12       | 6      | Low  | Winter | Rectal | 7   | 5010                 | 3         | 0         | 2         | 7         |



| Animal ID | Pen ID | Dose | Season | Route  | Day | STEC O157 CFU counts | Strain C1 | Strain C2 | Strain B1 | Strain B2 |
|-----------|--------|------|--------|--------|-----|----------------------|-----------|-----------|-----------|-----------|
| T12       | 6      | Low  | Winter | Rectal | 14  | 15                   | 0         | 1         | 0         | 0         |
| T12       | 6      | Low  | Winter | Rectal | 21  | 0                    | 0         | 0         | 0         | 0         |
| T12       | 6      | Low  | Winter | Rectal | 28  | 0                    | 0         | 0         | 0         | 0         |
| T12       | 6      | Low  | Winter | Rectal | 35  | 0                    | 0         | 0         | 0         | 0         |
| T12       | 6      | Low  | Winter | Rectal | 42  | 0                    | 0         | 0         | 0         | 0         |
| T12       | 6      | Low  | Winter | Rectal | 49  | 0                    | 0         | 0         | 0         | 0         |
| T12       | 6      | Low  | Winter | Rectal | 56  | 0                    | 0         | 0         | 0         | 0         |
| T17       | 9      | Low  | Winter | Rectal | 0   | 0                    | 0         | 0         | 0         | 0         |
| T17       | 9      | Low  | Winter | Rectal | 1   | 306000               | 6         | 1         | 5         | 0         |
| T17       | 9      | Low  | Winter | Rectal | 3   | 294000               | 2         | 2         | 0         | 8         |
| T17       | 9      | Low  | Winter | Rectal | 7   | 60                   | 0         | 2         | 0         | 0         |
| T17       | 9      | Low  | Winter | Rectal | 14  | 60                   | 1         | 1         | 0         | 0         |
| T17       | 9      | Low  | Winter | Rectal | 21  | 120                  | 1         | 4         | 0         | 1         |
| T17       | 9      | Low  | Winter | Rectal | 28  | 90                   | 3         | 0         | 0         | 0         |
| T17       | 9      | Low  | Winter | Rectal | 35  | 15                   | 1         | 0         | 0         | 2         |
| T17       | 9      | Low  | Winter | Rectal | 42  | 15                   | 0         | 3         | 0         | 0         |
| T17       | 9      | Low  | Winter | Rectal | 49  | 180                  | 0         | 9         | 0         | 0         |
| T17       | 9      | Low  | Winter | Rectal | 56  | 30                   | 0         | 0         | 0         | 1         |
| T2        | 2      | Low  | Winter | Rectal | 0   | 0                    | 0         | 0         | 0         | 0         |
| T2        | 2      | Low  | Winter | Rectal | 1   | 26700                | 6         | 2         | 0         | 4         |
| T2        | 2      | Low  | Winter | Rectal | 3   | 55800                | 9         | 0         | 3         | 0         |
| T2        | 2      | Low  | Winter | Rectal | 7   | 240                  | 5         | 2         | 0         | 1         |
| T2        | 2      | Low  | Winter | Rectal | 14  | 270                  | 3         | 6         | 0         | 0         |
| T2        | 2      | Low  | Winter | Rectal | 21  | 90                   | 5         | 0         | 0         | 0         |
| T2        | 2      | Low  | Winter | Rectal | 28  | 15                   | 3         | 0         | 0         | 0         |
| T2        | 2      | Low  | Winter | Rectal | 35  | 30                   | 1         | 0         | 0         | 0         |
| T2        | 2      | Low  | Winter | Rectal | 42  | 0                    | 0         | 0         | 0         | 0         |
| T2        | 2      | Low  | Winter | Rectal | 49  | 15                   | 3         | 0         | 0         | 0         |
| T2        | 2      | Low  | Winter | Rectal | 56  | 15                   | 1         | 2         | 0         | 0         |
| T20       | 9      | Low  | Winter | Rectal | 0   | 0                    | 0         | 0         | 0         | 0         |
| T20       | 9      | Low  | Winter | Rectal | 1   | 42000                | 6         | 1         | 1         | 4         |
| T20       | 9      | Low  | Winter | Rectal | 3   | 6600                 | 5         | 1         | 1         | 5         |
| T20       | 9      | Low  | Winter | Rectal | 7   | 75600                | 3         | 0         | 1         | 8         |
| T20       | 9      | Low  | Winter | Rectal | 14  | 120                  | 0         | 0         | 4         | 0         |
| T20       | 9      | Low  | Winter | Rectal | 21  | 15                   | 0         | 0         | 0         | 3         |
| T20       | 9      | Low  | Winter | Rectal | 28  | 0                    | 0         | 0         | 0         | 0         |
| T20       | 9      | Low  | Winter | Rectal | 35  | 0                    | 0         | 0         | 0         | 0         |
| T20       | 9      | Low  | Winter | Rectal | 42  | 0                    | 0         | 0         | 0         | 0         |

| Animal ID | Pen ID | Dose | Season | Route  | Day | STEC O157 CFU counts | Strain C1 | Strain C2 | Strain B1 | Strain B2 |
|-----------|--------|------|--------|--------|-----|----------------------|-----------|-----------|-----------|-----------|
| T20       | 9      | Low  | Winter | Rectal | 49  | 0                    | 0         | 0         | 0         | 0         |
| T20       | 9      | Low  | Winter | Rectal | 56  | 0                    | 0         | 0         | 0         | 0         |
| T4        | 4      | Low  | Winter | Rectal | 0   |                      |           |           |           |           |
| T4        | 4      | Low  | Winter | Rectal | 1   |                      |           |           |           |           |
| T4        | 4      | Low  | Winter | Rectal | 3   |                      |           |           |           |           |
| T4        | 4      | Low  | Winter | Rectal | 7   |                      |           |           |           |           |
| T4        | 4      | Low  | Winter | Rectal | 14  |                      |           |           |           |           |
| T4        | 4      | Low  | Winter | Rectal | 21  |                      |           |           |           |           |
| T4        | 4      | Low  | Winter | Rectal | 28  |                      |           |           |           |           |
| T4        | 4      | Low  | Winter | Rectal | 35  |                      |           |           |           |           |
| T4        | 4      | Low  | Winter | Rectal | 42  |                      |           |           |           |           |
| T4        | 4      | Low  | Winter | Rectal | 49  |                      |           |           |           |           |
| T4        | 4      | Low  | Winter | Rectal | 56  |                      |           |           |           |           |
| T6        | 4      | Low  | Winter | Rectal | 0   | 0                    | 0         | 0         | 0         | 0         |
| T6        | 4      | Low  | Winter | Rectal | 1   | 21600                | 5         | 2         | 1         | 4         |
| T6        | 4      | Low  | Winter | Rectal | 3   | 8700                 | 1         | 0         | 0         | 11        |
| T6        | 4      | Low  | Winter | Rectal | 7   | 3320                 | 0         | 0         | 1         | 11        |
| T6        | 4      | Low  | Winter | Rectal | 14  | 90                   | 0         | 0         | 0         | 3         |
| T6        | 4      | Low  | Winter | Rectal | 21  | 60                   | 0         | 0         | 0         | 1         |
| T6        | 4      | Low  | Winter | Rectal | 28  | 30                   | 0         | 0         | 0         | 1         |
| T6        | 4      | Low  | Winter | Rectal | 35  | 0                    | 0         | 0         | 0         | 0         |
| T6        | 4      | Low  | Winter | Rectal | 42  | 0                    | 0         | 0         | 0         | 0         |
| T6        | 4      | Low  | Winter | Rectal | 49  | 0                    | 0         | 0         | 0         | 0         |
| T6        | 4      | Low  | Winter | Rectal | 56  | 0                    | 0         | 0         | 0         | 0         |
| T8        | 6      | Low  | Winter | Rectal | 0   | 0                    | 0         | 0         | 0         | 0         |
| T8        | 6      | Low  | Winter | Rectal | 1   | 612000               | 5         | 0         | 3         | 4         |
| T8        | 6      | Low  | Winter | Rectal | 3   | 963000               | 1         | 2         | 1         | 8         |
| T8        | 6      | Low  | Winter | Rectal | 7   | 1830                 | 0         | 0         | 0         | 12        |
| T8        | 6      | Low  | Winter | Rectal | 14  | 15                   | 2         | 1         | 0         | 0         |
| T8        | 6      | Low  | Winter | Rectal | 21  | 15                   | 1         | 1         | 0         | 1         |
| T8        | 6      | Low  | Winter | Rectal | 28  | 60                   | 1         | 1         | 0         | 0         |
| T8        | 6      | Low  | Winter | Rectal | 35  | 30                   | 0         | 1         | 0         | 0         |
| T8        | 6      | Low  | Winter | Rectal | 42  | 30                   | 0         | 1         | 0         | 0         |
| T8        | 6      | Low  | Winter | Rectal | 49  | 60                   | 0         | 2         | 0         | 0         |
| T8        | 6      | Low  | Winter | Rectal | 56  | 60                   | 4         | 0         | 0         | 0         |
| T9        | 1      | Low  | Winter | Rectal | 0   | 0                    | 0         | 0         | 0         | 0         |
| T9        | 1      | Low  | Winter | Rectal | 1   | 69300                | 1         | 7         | 1         | 3         |
| T9        | 1      | Low  | Winter | Rectal | 3   | 32100                | 5         | 2         | 3         | 2         |

| <b>Animal ID</b> | <b>Pen ID</b> | <b>Dose</b> | <b>Season</b> | <b>Route</b> | <b>Day</b> | <b>STEC O157 CFU counts</b> | <b>Strain C1</b> | <b>Strain C2</b> | <b>Strain B1</b> | <b>Strain B2</b> |
|------------------|---------------|-------------|---------------|--------------|------------|-----------------------------|------------------|------------------|------------------|------------------|
| T9               | 1             | Low         | Winter        | Rectal       | 7          | 81000                       | 4                | 6                | 0                | 2                |
| T9               | 1             | Low         | Winter        | Rectal       | 14         | 1170                        | 0                | 12               | 0                | 0                |
| T9               | 1             | Low         | Winter        | Rectal       | 21         | 420                         | 0                | 12               | 0                | 0                |
| T9               | 1             | Low         | Winter        | Rectal       | 28         | 0                           | 0                | 0                | 0                | 0                |
| T9               | 1             | Low         | Winter        | Rectal       | 35         | 0                           | 0                | 0                | 0                | 0                |
| T9               | 1             | Low         | Winter        | Rectal       | 42         | 0                           | 0                | 0                | 0                | 0                |
| T9               | 1             | Low         | Winter        | Rectal       | 49         | 0                           | 0                | 0                | 0                | 0                |
| T9               | 1             | Low         | Winter        | Rectal       | 56         | 0                           | 0                | 0                | 0                | 0                |

Table S2: Number of animals with STEC O157 RAJ colonization by trial and day

| <b>Trial</b>       | <b>Day 0</b> | <b>Day 1</b> | <b>Day 3</b> | <b>Day 7</b> | <b>Day 14</b> | <b>Day 21</b> | <b>Day 28</b> | <b>Day 35</b> | <b>Day 42</b> | <b>Day 49</b> | <b>Day 56</b> |
|--------------------|--------------|--------------|--------------|--------------|---------------|---------------|---------------|---------------|---------------|---------------|---------------|
| High Dose - Summer | 5            | 20           | 20           | 19           | 12            | 9             | 9             | 7             | 7             | 3             | 3             |
| High Dose - Winter | 1            | 20           | 20           | 20           | 16            | 12            | 10            | 9             | 9             | 8             | 7             |
| Low Dose - Summer  | 3            | 20           | 19           | 17           | 12            | 8             | 6             | 6             | 3             | 1             | 0             |
| Low Dose - Winter  | 1            | 19           | 19           | 19           | 13            | 11            | 8             | 6             | 5             | 5             | 5             |



| Trial <sup>a</sup> | Route  | Pen | Animal | Genotypes Present <sup>b</sup> |          |          |          |         |          |          |        |        |        |        |
|--------------------|--------|-----|--------|--------------------------------|----------|----------|----------|---------|----------|----------|--------|--------|--------|--------|
|                    |        |     |        | Day 0                          | Day 1    | Day 3    | Day 7    | Day 14  | Day 21   | Day 28   | Day 35 | Day 42 | Day 49 | Day 56 |
|                    |        |     | 9 T17  | B2                             | C2/B2(4) | B2(3)    | B2       | B2,     | B2       | B2       | B2     | B2     | B2     | B2     |
|                    |        |     | 9 T20  |                                | C1(3)    | B1(3)    | B1/B2(2) | C/B1(2) | B2(2)    | B2       | B2     | B2     | B2     | B2     |
|                    | Rectal |     | 3 T3   |                                | B2(3)    | C1(3)    | C2(3)    | B2      | B2       | B2       | B2     | B2     | B2     | B2     |
|                    |        |     | 3 T5   |                                | B2(4)    | B1/B2(4) | C1(4)    | B2(3)   |          |          |        |        |        |        |
|                    |        |     | 5 T15  |                                | B2(4)    | C2(3)    | B2(3)    | C2      | B2       |          |        |        |        |        |
|                    |        |     | 5 T7   |                                | C1(3)    | C1/B2(2) | B2(4)    | C1(4)   | C1(2)    | C1/C2(2) | C1(4)  | C2(3)  | B2(2)  | C1     |
|                    |        |     | 7 T11  |                                | C1(2)    | C2(4)    | B2(2)    | C2      |          |          |        |        |        |        |
|                    |        |     | 7 T13  |                                | C1(3)    | B1(4)    | B2(2)    | B2      | C2(2)    | C2       | C1     | C1     | C1     |        |
|                    |        |     | 8 T14  |                                | B1(4)    | B2(3)    | B2(3)    | C2(2)   | B2       | B2       | B2     | B2     | B2     | B2     |
|                    |        |     | 8 T16  |                                | B2(4)    | C1/B2(4) | C1(4)    | C1      | C1       | C1       | C1     | C1     | C1     | C1     |
|                    |        |     | 10 T18 |                                | B1(3)    | B2(3)    | B2(4)    | B2(4)   | C1       | B2       |        |        |        |        |
|                    |        |     | 10 T19 |                                | B1/B2(4) | B2(3)    | C2       | B2      |          |          |        |        |        |        |
| LS                 | Oral   |     | 3 T3   |                                | B1(4)    | B1       | B1       | B1      | B1       | B1       | B1     |        |        |        |
|                    |        |     | 3 T5   |                                | B1(4)    |          |          |         |          |          |        |        |        |        |
|                    |        |     | 5 T15  |                                | B1(3)    | C1(2)    | C1(3)    | C1      |          | C2       | C1     |        |        |        |
|                    |        |     | 5 T7   |                                | B1(3)    | B1       |          |         |          |          |        |        |        |        |
|                    |        |     | 7 T11  |                                | C1/B1(2) | B2(3)    | B1(2)    | C1      |          |          |        |        |        |        |
|                    |        |     | 7 T13  |                                | C1(2)    | C1(2)    | B1(2)    | C1      | B1(2)    | C1(2)    | C1     | C1     |        |        |
|                    |        |     | 8 T14  |                                | C1(2)    | B1       | B1       | B1      | B1       | B1       | B1     | B1     | C1     |        |
|                    |        |     | 8 T16  |                                | B1       | B1(2)    | B1(3)    | B2(3)   |          |          |        |        |        |        |
|                    |        |     | 10 T18 |                                | B1(3)    | C1(3)    | B1(4)    |         |          |          |        |        |        |        |
|                    |        |     | 10 T19 | C2                             | B1(2)    | B1       |          |         |          |          |        |        |        |        |
|                    | Rectal |     | 1 T1   |                                | C2(3)    | B2(2)    | C2       |         |          |          |        |        |        |        |
|                    |        |     | 1 T9   |                                | C1       | C1/C2(2) | C1(2)    | C1      | C1/C2(2) | C2       | C1     |        |        |        |
|                    |        |     | 2 T10  |                                | B2(4)    | B2(4)    | B2(2)    | B2      |          |          |        |        |        |        |
|                    |        |     | 2 T2   | C2                             | C2(2)    | C2       | C2       |         |          |          |        |        |        |        |
|                    |        |     | 4 T4   |                                | C1       |          | B2,      | B2      | B2       |          |        |        |        |        |
|                    |        |     | 4 T6   |                                | C1(3)    | C1(3)    | C2(4)    |         |          |          |        |        |        |        |
|                    |        |     | 6 T12  |                                | C2(4)    | B2(3)    | B2(2)    | B2(2)   | B2       |          |        |        |        |        |
|                    |        |     | 6 T8   |                                | C1(4)    | C1(3)    | C1/B2(2) |         |          |          |        |        |        |        |

| Trial <sup>a</sup> | Route | Pen | Animal | Genotypes Present <sup>b</sup> |          |          |          |          |          |        |        |        |        |        |       |    |
|--------------------|-------|-----|--------|--------------------------------|----------|----------|----------|----------|----------|--------|--------|--------|--------|--------|-------|----|
|                    |       |     |        | Day 0                          | Day 1    | Day 3    | Day 7    | Day 14   | Day 21   | Day 28 | Day 35 | Day 42 | Day 49 | Day 56 |       |    |
|                    |       |     | 9 T17  | C1                             | C1(3)    | B2(2)    | B2       | B2       | B2       | B2     | B2     |        | C1     |        |       |    |
|                    |       |     | 9 T20  |                                | B2(4)    | B2(3)    | C1(2)    | C1       |          |        |        |        |        |        |       |    |
| LW                 | Oral  |     | 3 T3   |                                | B1(2)    | C1(3)    | B2(2)    |          |          |        |        |        |        |        |       |    |
|                    |       |     | 3 T5   |                                | B1(2)    | C1       | C1       | C1       |          |        |        |        |        |        |       |    |
|                    |       |     | 5 T15  |                                | B1(3)    | C1(3)    | C2(2)    | B2       | B2       |        |        |        |        |        |       |    |
|                    |       |     | 5 T7   |                                | B1(3)    | B2,      | C1/B2(2) | B2(2)    | C1/B2(2) | C1     | C1     |        |        |        |       |    |
|                    |       |     | 7 T11  |                                | B1(2)    | B1(2)    | B1(3)    |          |          |        |        |        |        |        |       |    |
|                    |       |     | 7 T13  | B2                             | B1(2)    | B1(2)    | C1(3)    |          | B1       | C2     |        |        |        |        |       |    |
|                    |       |     | 8 T14  |                                | C1(4)    | C1/B1(4) | B2(3)    | B2       | B2(2)    | B2     | B2     | B2     | B2     | B2     |       |    |
|                    |       |     | 8 T16  |                                | C1(3)    | B1(3)    | B2(2)    |          |          |        |        |        |        |        |       |    |
|                    |       |     | 10 T18 |                                | C1/B1(2) | C1/B1(2) | B1(2)    |          |          |        |        |        |        |        |       |    |
|                    |       |     | 10 T19 |                                | C1(2)    | B1(2)    | C1/B1(2) |          |          |        |        |        |        |        |       |    |
|                    |       |     | Rectal |                                | 1 T1     |          | B1(3)    | C2/B2(4) | C1       | B2     | C2(2)  | C2(2)  | C2     |        | C2    | C2 |
|                    |       |     |        | 1 T9                           |          | C2(4)    | C1(4)    | C2(3)    | C2       | C2     |        |        |        |        |       |    |
|                    |       |     |        | 2 T10                          |          | B2(4)    | B2(3)    | C2       |          |        |        |        |        |        |       |    |
|                    |       |     |        | 2 T2                           |          | C1(3)    | C1(2)    | C1(3)    | C2(2)    | C1     | C1     | C1     |        | C1     | C2(2) |    |
|                    | 4 T4  |     |        |                                |          |          |          |          |          |        |        |        |        |        |       |    |
|                    | 4 T6  |     |        | C1(4)                          | B2(2)    | B2(2)    | B2       | B2       | B2       |        |        |        |        |        |       |    |
|                    | 6 T12 |     |        | C1(4)                          | B1(4)    | B2(3)    | C2       |          |          |        |        |        |        |        |       |    |
|                    | 6 T8  |     |        | C1(3)                          | B2(4)    | B2       | C1(2)    | C1/C2/B2 | C1/C2(2) | C2     | C2     | C2     | C1     |        |       |    |
|                    | 9 T17 |     |        | C1(3)                          | B2(3)    | C2       | C1/C2(2) | C2(3)    | C1       | B2(2)  | C2     | C2     | B2     |        |       |    |
|                    | 9 T20 |     |        | C1(4)                          | C1/B2(4) | B2(3)    | B1       | B2       |          |        |        |        |        |        |       |    |

<sup>a</sup> The 20 mature Holstein steers received a single dose of a cocktail of four STEC O157 strains in approximately equal numbers in each trial [HS (high dose, summer), HW (high dose, winter), LS (low dose, summer) and LW (low dose, winter)]. Strains C1 and C2 representing two common clinical genotypes and B1 and B2 representing two common bovine-biased genotypes.

<sup>b</sup> Genotype at highest CFU (number of different genotypes detected). When only single genotype was detected, "the number of different genotypes detected" is not mentioned.
